# Supplementary material for: WHU-SGCC: A novel approach for blending daily satellite (CHIRP) and precipitation observations over Jinsha River Basin
Source: Copernicus journal article supplement (doi:10.5194/essd-2018-150), 2019-01-02
Supplement: Supplementary file [file essd-2018-150-AC2-supplement.zip]

# WHU-SGCC: A novel approach for blending daily satellite (CHIRP) and precipitation observations over the Jinsha River Basin

Gaoyun Shen<sup>1</sup>, Nengcheng Chen<sup>1,2</sup>, Wei Wang<sup>1,2</sup>, Zeqiang Chen<sup>1,2</sup>

<sup>1</sup> State Key Laboratory of Information Engineering in Surveying, Mapping and Remote Sensing, Wuhan University, 129 Luoyu Road, Wuhan 430079, China

<sup>2</sup> Collaborative Innovation Center of Geospatial Technology, Wuhan 430079, China

Correspondence to: ZeqiangChen@whu.edu.cn; Tel.: +86 13871025965; Fax: +86 27 68778229.

**Abstract.** Accurate and consistent satellite-based precipitation estimates blended with rain gauge data are important for regional precipitation monitoring and hydrological applications, especially in regions with limited rain gauges. However, existing fusion precipitation estimates often have large uncertainties over mountainous areas with complex topography and sparse rain gauges, and the existing data blending algorithms are very bad at removing the day-by-day random errors. Therefore, the development of effective methods for high-accuracy precipitation estimates over complex terrain and on a daily scale is of vital importance for mountainous hydrological applications. This study aims to offer a novel approach for blending daily precipitation gauge data and the Climate Hazards Group Infrared Precipitation (CHIRP, daily, 0.05°) satellite-derived precipitation ~~developed by the UC Santa Barbara estimates~~ over the Jinsha River Basin for the period of June-July-August ~~in~~ from 1994 to 2014. This method is named the Wuhan University Satellite and Gauge precipitation Collaborated Correction (WHU-SGCC). The results show that the WHU-SGCC method is effective in liquid precipitation bias adjustments from point to surface, which is evaluated by multiple error statistics and from different perspectives~~seategorical indices~~. Moreover, the accuracy of the spatial distribution of the precipitation estimates derived from the WHU-SGCC method is related to the complexity of the topography. The validation also verifies that the proposed approach is effective in the detection of the major precipitation events inside the Jinsha River Basin with the daily precipitation less than 25 mm~~that are less than 20 mm~~. This study indicates that the WHU-SGCC approach is a promising tool to monitor monsoon precipitation over the Jinsha River Basin, the complicated mountainous terrain with sparse rain gauge data, considering the spatial correlation and the historical precipitation characteristics. The daily precipitation estimations at 0.05° resolution over the Jinsha River Basin during the summer seasons from 1990 to 2014~~in summer 2016~~, derived from WHU-SGCC are available at the PANGAEA Data Publisher for Earth & Environmental Science portal (<https://doi.pangaea.de/10.1594/PANGAEA.896615>)

## 1 Introduction

Accurate and consistent estimates of precipitation are vital for hydrological modelling, flood forecasting and climatological studies in support of better planning and decision making (Agutu et al., 2017; Cattani et al., 2018; Roy et al., 2017). In general, ground-based gauge networks include a substantial number of liquid precipitation observations measured with high accuracy, high temporal resolution, and long historical records. However, sparse distribution and point measurements limit the accurate estimation of spatially gridded rainfall (Martens et al., 2013).

Due to the sparseness of rain gauges and their uneven ~~spatial distribution~~~~distributed~~ and high proportion of missing data, satellite-derived precipitation data are an attractive supplement offering the advantage of plentiful information with high spatio-temporal resolution over widespread regions, particularly over oceans, high elevation mountainous regions, and other remote regions where gauge networks are difficult to deploy. However, ~~the retrieval algorithms for satellite-based precipitation estimates are susceptible to systematic biases in hydrologic modelling~~ satellite estimates are susceptible to systematic biases that can influence hydrological modelling and the retrieval algorithms are relatively insensitive to light rainfall events, especially in complex terrain, resulting in underestimation of the magnitude of precipitation events (Behrangi et al.,

带格式的: 字体: (默认) Times New Roman

40 2014;Thiemig et al., 2013;Yang et al., 2017). Without adjustments, inaccurate satellite-based precipitation estimates ~~without~~  
41 ~~adjustment~~ will lead to unreliable assessments of risk and reliability (AghaKouchak et al., 2011).

42 Accordingly, there are many kinds of precipitation estimates combining multiple sources datasets. Since 1997, the Tropical  
43 Rainfall Measurement Mission (TRMM) has improved satellite-based rainfall retrievals over tropical regions (Kummerow et  
44 al., 1998;Simpson et al., 1988), and then applies a stepwise method for blending daily TRMM Multisatellite Precipitation  
45 Analysis (TMPA) output with rain gauges in South America (Vila et al., 2009). The Global Precipitation Measurement (GPM)  
46 satellite was launched after the success of the TRMM satellite by the cooperation of National Aeronautics and Space  
47 Administration (NASA) and Japan Aerospace Exploration Agency (JAXA) on February 27, 2014 (Mahmoud et al., 2018;Ning  
48 et al., 2016). The main core observatory satellite (GPM) cooperates with the ten other satellites (partners) to offer the high  
49 spatiotemporal resolution products ( $0.1^{\circ} \times 0.1^{\circ}$ , half-hourly) of the global real-time precipitation estimates (Mahmoud et al.,  
50 2019). The Geostationary Operational Environmental Satellite (GOES)-R Series is the geostationary weather satellites, which  
51 significantly improves the detection and observation of environmental phenomena. The Advanced Baseline Imager (ABI)  
52 onboard the GOES-R platform will provide images in 16 spectral bands, spatial resolution of 0.5 to 2 km (2 km in the infrared  
53 and 1–0.5 km in the visible), and full-disk scanning every 5 minutes over the continental United States. The GOES-R Series  
54 will offer the enhanced capabilities for satellite-based rainfall estimation and nowcasting (Behrangi et al., 2009;Schmit et al.,  
55 2005). The Global Precipitation Climatology Project (GPCP) is one of the successful projects for blending rain gauge analysis  
56 and multiple satellite-based precipitation estimates, and constructed a relatively coarse-resolution (monthly,  $2.5^{\circ} \times 2.5^{\circ}$ ) global  
57 precipitation dataset (Adler et al., 2003;Huffman et al., 1997). To improve the resolution of this satellite-based dataset, the  
58 GPCC network data was incorporated into remote sensing information with Artificial Neural Networks (PERSIANN) rainfall  
59 estimates, which provides finer temporal and spatial resolutions (daily,  $0.25^{\circ} \times 0.25^{\circ}$ ) (Ashouri et al., 2015). The CPC Merged  
60 Analysis of Precipitation (CMAP) product is a data blending and fusion analysis of gauge data and satellite-based precipitation  
61 estimates (Xie and Arkin, 1996). CMAP has a long-term dataset series from 1979, while the resolution is relatively coarse.  
62 Although the aforementioned products are widely used and have performed well, the data resolution cannot achieve high  
63 accuracy in precipitation monitoring over the Jinsha River Basin, China.

64 Currently, the Climate Hazards Group Infrared Precipitation with Station data (CHIRPS) developed by the UC Santa Barbara,  
65 which has a higher spatial resolution ( $0.05^{\circ}$ ), can solve the scale problem. CHIRPS is a long-term precipitation data series,  
66 which merges three types of information: global climatology, satellite estimates and in situ observations. Table 1 shows the  
67 temporal and spatial resolution of current major satellite-based precipitation datasets. The CHIRPS precipitation dataset with  
68 several temporal and spatial scales has been evaluated in Brazil (Nogueira et al., 2018;Paredes-Trejo et al., 2017), Chile (Yang  
69 et al., 2016;Zambrano-Bigiarini et al., 2017), China (Bai et al., 2018), Cyprus (Katsanos et al., 2016b;Katsanos et al., 2016a),  
70 India (Ali and Mishra, 2017) and Italy (Duan et al., 2016). Nevertheless, the temporal resolutions of the aforementioned  
71 applications were mainly at seasonal and monthly scales, lacking the evaluation of daily precipitation. Additionally, despite  
72 the great potential of gauge-satellite fusing products for large-scale environmental monitoring, there are still large  
73 discrepancies with ground observations at the sub-regional level where these data are applied. Furthermore, the CHIRPS  
74 product reliability has not been analysed in detail for the Jinsha River Basin, China, particularly on a daily scale. The existing  
75 research indicates that estimations over mountainous areas with complex topography often have large uncertainties and  
76 systematic errors due to the topography, seasonality, climate impact and sparseness of rain gauges (Derin et al., 2016;Maggioni  
77 and Massari, 2018;Zambrano-Bigiarini et al., 2017)(Zambrano-Bigiarini et al., 2017). Moreover, (Bai et al., 2018) evaluates  
78 CHIRPS over mainland China and indicates that the performance of CHIRPS is poor over the Sichuan Basin and the Northern  
79 China Plain, which have complex terrains with substantial variations in elevation. Additionally, (Trejo et al., 2016) shows that  
80 CHIRPS overestimates low monthly rainfall and underestimates high monthly rainfall using several numerical metrics, and  
81 rainfall event frequency is overestimated excluding the rainy season.

带格式的: 定义网格后不调整右缩进, 不调整西文与中文之间的空格, 不调整中文和数字之间的空格

带格式的: 字体: (默认) Times New Roman, 10 磅, 英语(英国)

带格式的: 字体: 10 磅

带格式的: 字体: 10 磅

带格式的: 字体: (默认) Times New Roman, 10 磅

带格式的: 字体: 10 磅

带格式的: 字体: (默认) Times New Roman, 10 磅

带格式的: 字体: 10 磅

82

**Table 1** Coverage and spatiotemporal resolutions of major satellite precipitation datasets

| Product        | Temporal resolution                                 | Spatial resolution  | Period                 | Coverage                                                                                          |
|----------------|-----------------------------------------------------|---------------------|------------------------|---------------------------------------------------------------------------------------------------|
| TRMM 3B42      | 3hours                                              | 0.25°               | 1998-present           | 50°S-50°N                                                                                         |
| GPM            | 30min/Hourly/<br>3hours/Daily/3Day/7<br>Day/Monthly | 0.1°/0.25°/0.05°/5° | 2014-present           | 60°S-60°N<br>70°N-70°S<br>90°N-90°S<br>the continental<br>United States/<br>western<br>hemisphere |
| GOES-R         | 5min/15min                                          | 0.5-2 km            | 2016-present           |                                                                                                   |
| GPCP           | Monthly/Pentad                                      | 2.5°                | 1979-(delayed) present | 90°S-90°N                                                                                         |
| PRERSSIANN-CDR | Daily                                               | 0.25°               | 1983-(delayed) present | 60°S-60°N                                                                                         |
| CMAP           | Monthly                                             | 2.5°                | 1979- present          | 90°S-90°N                                                                                         |
| CHIRPS         | Annual/Monthly/<br>Dekad/Pentad/Daily               | 0.05°/0.25°         | 1981- present          | 50°S-50°N                                                                                         |

带格式的: 字体: (中文) 宋体, 字体颜色: 文字 1

带格式的: 字体: (默认) Times New Roman, (中文) 宋体, 小五, 字体颜色: 文字 1

带格式的: 字体: (默认) Times New Roman, (中文) 宋体, 小五, 字体颜色: 文字 1

带格式的: 字体: 小五, 字体颜色: 文字 1

带格式的: 字体: (中文) + 中文正文 (等线), 小五

带格式的: 字体: (默认) Times New Roman, (中文) 宋体, 小五, 字体颜色: 文字 1

83

To overcome these limitations, many studies have focused on proposing effective methodologies for blending rain gauge observations and satellite-based precipitation estimates, and sometimes radar data to take advantage of each dataset. Many numerical models are established among these datasets for high-accuracy precipitation estimations, such as bias adjustment by a quantile mapping (QM) approach (Yang et al., 2016), Bayesian kriging (BK) (Verdin et al., 2015) and a conditional merging technique (Berndt et al., 2014). Among aforementioned methods, the QM approach is a distribution-based approach, which works with historical data for bias adjustment and is effective in reducing the systematic bias of regional climate model precipitation estimates at monthly or seasonal scales (Chen et al., 2013). However, the QM approach offers very limited improvement in removing day-by-day random errors. The BK approach shows very good model fit with precipitation observations. Unfortunately, the Gaussian assumption of the BK model is invalid for daily scales. Overall, there is a lack of effective methods for high-accuracy precipitation estimates over complex terrain on a daily scale.

93

As such, due to the poor performance of CHIRPS data at the sub-regional scale and the shortcomings of the existing blending algorithms, the aim of this article is to offer a novel approach for blending daily liquid precipitation gauge data, gridded precipitation data and the Climate Hazards Group Infrared Precipitation (CHIRP) satellite-derived precipitation estimates developed by the UC Santa Barbara, over the Jinsha River Basin. Here, we will use precipitation to name liquid precipitation throughout the text. The CHIRP is the raw data of CHIRPS before blending in rain gauge data. The objective is to build corresponding precipitation models that consider terrain factors and precipitation characteristics to produce high-quality precipitation estimates. This novel method is named the Wuhan University Satellite and Gauge precipitation Collaborated Correction (WHU-SGCC) method. We demonstrate this method by applying it to daily precipitation over the Jinsha River Basin during the summer seasons from 1990 to 2014in summer 2016. The results support the validity of the proposed approach for producing refined satellite-gauge precipitation estimates over mountainous areas.

103

The remainder of this paper is organized as follows: Section 2 describes the study region and precipitation-rain gauges; gridded-observations and CHIRPS dataset used in this study. Section 3 presents the principle of the WHU-SGCC approach for high-accuracy precipitation estimates. The results and discussion are analysed in Section 4, and conclusions and future work are presented in Section 5.

106

## 2 Study Region and Data

107

### 2.1 Study Region

108

The Yangtze River, one of the largest and most important rivers in Southeast Asia, originates on the Tibetan Plateau and extends approximately 6300 km eastward to the East China Sea. The river's catchment proximately covers an area of approximately  $\sim 180 \times 10^4 \text{ km}^2$  and the average annual precipitation is approximately 1100 mm (Zhang et al., 2019). In 2016, the average precipitation in the Yangtze River Basin was 12053 mm and the total precipitation was 21478.71 billion  $\text{m}^3$ , which is 10.9% higher than the annual average total precipitation. Yangtze River is divided into nine sub-regions basins, the upper drainage

带格式的: 缩进: 首行缩进: 0 厘米

带格式的: 字体: 10 磅

basin is the Jinsha River Basin, which flows through the provinces of Qinghai, Sichuan, and Yunnan in western China. The total river length is 3486 km, accounting for 77% of the length of the upper Yangtze River, and covering a watershed area of  $460 \times 10^3 \text{ km}^2$ . The location of the Jinsha River Basin is shown in Fig. 1, and covers the eastern part of the Tibetan Plateau and the part of the Hengduan Mountains. The southern portion of the river basin is the Northern Yunnan Plateau and the eastern portion includes a wide area of the southwestern margin of the Sichuan basin. Crossing complex and varied terrains, the elevation of the Jinsha River ranges from 263 to 6575 m above sea level, which results in significant temporal and spatial climate-weather variation within the basin. The average annual precipitation of the Jinsha River Basin is approximately 710 mm, the average annual precipitation of the lower reaches is approximately 900-1300 mm, while the average annual precipitation of the middle and upper reaches is approximately 600-800 mm (Yuan et al., 2018). Average annual preeipitation in the Jinsha River Basin is approximately 3433.45 mm, the total annual precipitation north of Shigu is 937.25 mm, while south of Shigu annual precipitation is 2496.20 mm. The climate of the Jinsha River Basin has more precipitation during the warm-summer season (June-July-August, JJA), which is affected by oceanic southwest and southeast monsoons and is drier in cold-season (December to February). Therefore, the blending of satellite estimations with gauged observations during the summer (JJA) is the main focus of this research.

带格式的: 上标

带格式的: 字体: 10 磅

带格式的: 非突出显示

带格式的: 字体: (中文) 宋体, 英语(美国)

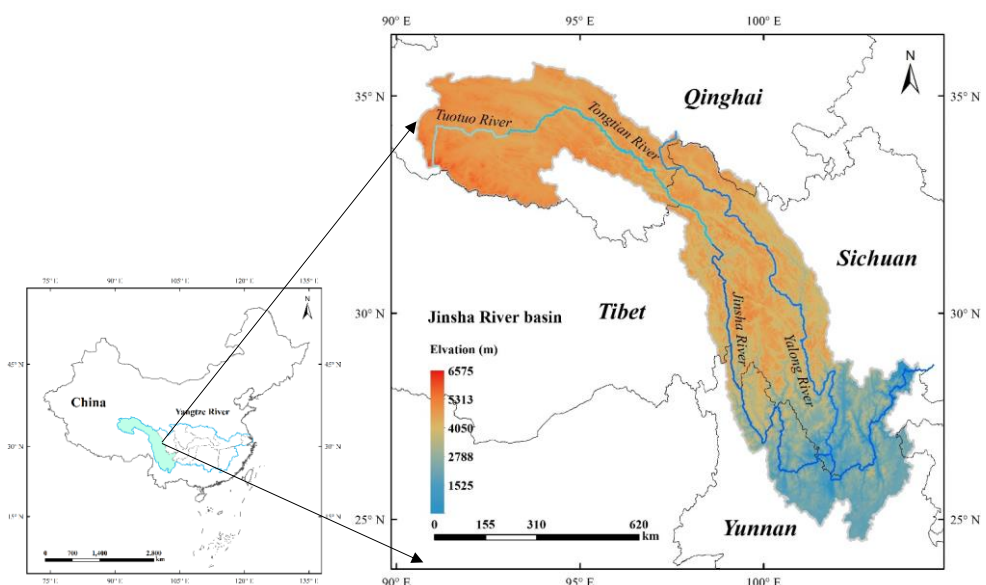

Figure 1 Location of the study area with key topographic features.

## 2.2 Study Data

### 2.2.1 Precipitation gauged observations

Daily rain gauge observations at 30 national standard rain stations in the Jinsha River Basin ~~for~~ during the JJA from 1990 to 2014 were provided by the National Climate Centre (NCC) of the China Meteorological Administration (CMA) ([http://data.cma.cn/data/cdcdetail/dataCode/SURF\\_CLI\\_CHN\\_MUL\\_DAY\\_V3.0.html](http://data.cma.cn/data/cdcdetail/dataCode/SURF_CLI_CHN_MUL_DAY_V3.0.html), last access: 10 December, 2018), which imposes a strict quality control at station-provincial-state levels. Station identification numbers and relevant geographical characteristics are shown in Table 2, and their uneven spatial distribution is shown in Fig. 2. The selected rain gauges are located in Qinghai, Tibet, Sichuan and Yunnan Provinces but are mainly scattered in Sichuan Province, and the

number of rain gauges in the northern river basin is less than in the southern river basin. In this study, the gauge observations were used as the reference data in bias adjustment of satellite precipitation estimations.

141

**Table 2** Geographical characteristics of rain stations.

| Station number | Province | Lat (°N) | Lon (°E) | Elevation (m) |
|----------------|----------|----------|----------|---------------|
| 52908          | Qinghai  | 35.13    | 93.05    | 4823          |
| 56004          | Qinghai  | 34.13    | 92.26    | 4744          |
| 56021          | Qinghai  | 34.07    | 95.48    | 5049          |
| 56029          | Qinghai  | 33.00    | 96.58    | 4510          |
| 56034          | Qinghai  | 33.48    | 97.08    | 4503          |
| 56144          | Tibet    | 31.48    | 98.35    | 4743          |
| 56038          | Sichuan  | 32.59    | 98.06    | 4285          |
| 56146          | Sichuan  | 31.37    | 100.00   | 4703          |
| 56152          | Sichuan  | 32.17    | 100.20   | 4401          |
| 56167          | Sichuan  | 30.59    | 101.07   | 3374          |
| 56247          | Sichuan  | 30.00    | 99.06    | 2948          |
| 56251          | Sichuan  | 30.56    | 100.19   | 4284          |
| 56257          | Sichuan  | 30.00    | 100.16   | 3971          |
| 56357          | Sichuan  | 29.03    | 100.18   | 4280          |
| 56374          | Sichuan  | 30.03    | 101.58   | 3902          |
| 56459          | Sichuan  | 27.56    | 101.16   | 3002          |
| 56462          | Sichuan  | 29.00    | 101.30   | 4019          |
| 56475          | Sichuan  | 28.39    | 102.31   | 1850          |
| 56479          | Sichuan  | 28.00    | 102.51   | 2470          |
| 56485          | Sichuan  | 28.16    | 103.35   | 2060          |
| 56565          | Sichuan  | 27.26    | 101.31   | 2578          |
| 56571          | Sichuan  | 27.54    | 102.16   | 1503          |
| 56666          | Sichuan  | 26.35    | 101.43   | 1567          |
| 56671          | Sichuan  | 26.39    | 102.15   | 1125          |
| 56543          | Yunnan   | 27.50    | 99.42    | 3216          |
| 56586          | Yunnan   | 27.21    | 103.43   | 2349          |
| 56651          | Yunnan   | 26.51    | 100.13   | 2449          |
| 56664          | Yunnan   | 26.38    | 101.16   | 1540          |
| 56684          | Yunnan   | 26.24    | 103.15   | 2184          |
| 56778          | Yunnan   | 25.00    | 102.39   | 1975          |

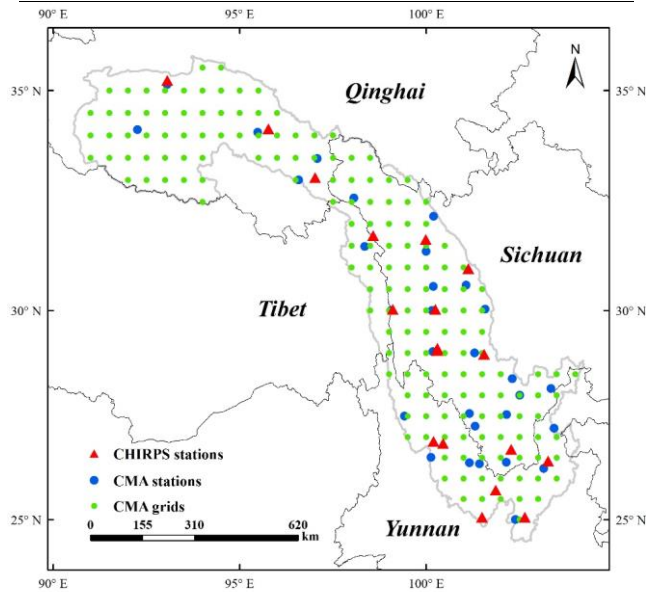

142

143

144

The multi-year (1990-2014) average annual precipitation during the JJA over the Jinsha River Basin increases from north to south (Fig. 2). The spatial distribution of precipitation is uneven, with an average annual precipitation ranging from less

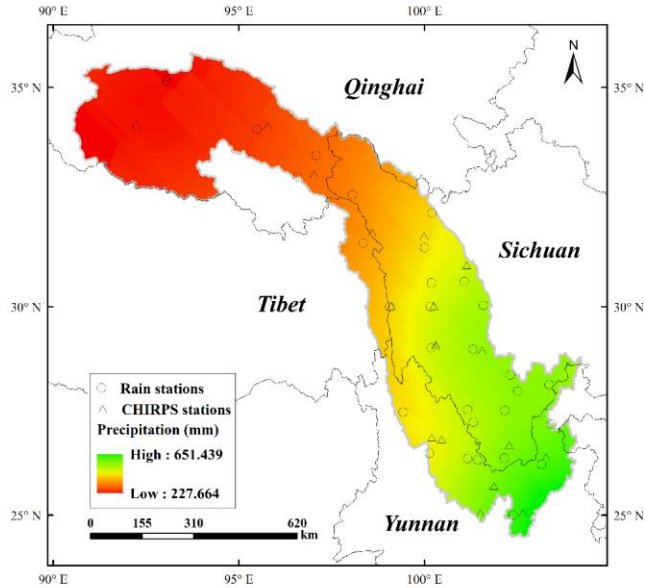

**Figure 2** Jinsha River Basin with 18 CHIRPS fusion stations, 30 gauge stations and 170 grid points provided by the China Meteorological Administration stations.

**Figure 2** The multi-year (1990-2014) average annual precipitation during JJA over the Jinsha River Basin. Jinsha River Basin with 30 rain stations were provided by the China Meteorological Administration stations, the other 1818 CHIRPS fusion stations were provided by the Climate Hazards Group UC Santa Barbara online at [ftp://ftp.chg.ucsb.edu/pub/org/chg/products/CHIRPS-2.0/diagnostics/global\\_monthly\\_station\\_density/tifs/p05/](ftp://ftp.chg.ucsb.edu/pub/org/chg/products/CHIRPS-2.0/diagnostics/global_monthly_station_density/tifs/p05/) (last access: 10 December, 2018).

, 30 gauge stations and 170 grid points provided by the China Meteorological Administration stations.

### 2.2.2 Gridded precipitation observations

The gridded precipitation data developed by CMA with  $0.5^\circ \times 0.5^\circ$  resolution on a daily scale, was interpolated from 2472 gauge observations with a thin plate spline algorithm from 1961 to the present. Over the Jinsha River Basin, a total of 170 gridded points were selected as the supplementary data for observations in JJA 2016, due to the 2472 gauged station data that were not shared on CMA ([http://data.cma.cn/data/cedetail/dataCode/SURF\\_CLI\\_CHN\\_PRE\\_DAY\\_GRID\\_0.5.html](http://data.cma.cn/data/cedetail/dataCode/SURF_CLI_CHN_PRE_DAY_GRID_0.5.html), last access: 10 December, 2018). The even distribution of daily gridded precipitation observations is shown in Fig. 2.

### 2.2.3 CHIRPS satellite-gauge fusion precipitation estimates

The CHIRPS v.2 dataset, a satellite-based daily rainfall product, is available online at [ftp://ftp.chg.ucsb.edu/pub/org/chg/products/CHIRPS-2.0/global\\_daily/tifs/p05/](ftp://ftp.chg.ucsb.edu/pub/org/chg/products/CHIRPS-2.0/global_daily/tifs/p05/) (last access: 10 December, 2018). It covers a quasi-global area (land only,  $50^\circ$  S- $50^\circ$  N) with several temporal scales (daily, 3-day, 6-day or monthly time steps) and high spatial resolution ( $0.05^\circ$ ) (Rivera et al., 2018). This dataset contains a wide variety of satellite-based rainfall products derived from multiple data sources and incorporates four data types: monthly precipitation from CHPClim v.1.0 (Climate Hazards Group's Precipitation Climatology version 1) derived from the combination of the satellite fields, gridded physiographic indicators, and in situ climate normal with the geospatial modelling approach based on moving window regressions and inverse distance weighting interpolation (Funk et al., 2015 b), quasi-global geostationary thermal infrared satellite observations (TRMM 3B42 version 7), atmospheric model rainfall fields CFS (Climate Forecast System) from NOAA, and surface based

带格式的: 字体: 10 磅



precipitation observations from various sources including national or regional meteorological services. The differences from other frequently used precipitation products are the higher resolution of 0.05° and the longer-term data series from 1981 to the present (Funk et al., 2015 a).

CHIRPS is the blended product of a two-part process. First, IR precipitation (IRP) pentad rainfall estimates are fused with corresponding CHPClim pentad data to produce an unbiased gridded estimate, called the Climate Hazards Group IR Precipitation (CHIRP), which is available online at <ftp://ftp.chg.ucsb.edu/pub/org/chg/products/CHIRP/daily/> (last access: 10 December, 2018). In the second part of the process, CHIRP data is blended with in situ precipitation observations obtained from a variety of sources including national and regional meteorological services by means of a modified inverse-distance weighting algorithm to create the final blended product, CHIRPS (Funk et al., 2014). The daily CHIRP satellite-based data over the Jinsha River Basin during the summer seasons from 1990 to 2014 ~~over Jinsha River Basin in JJA 2016~~ was selected as the input for WHU-SGCC blending with rain observations, and the corresponding daily CHIRPS blended data was used for comparisons of precipitation accuracy.

The blended in situ daily precipitation observations come from a variety of sources such as: the daily GHCN archive (Durre et al., 2010), the Global Summary of the Day dataset (GSOD) provided by NOAA's National Climatic Data Center, the World Meteorological Organization's Global Telecommunication System (GTS) daily archive provided by NOAA CPC, and over a dozen national and regional meteorological services. The number of daily CHIRP observation stations in the Jinsha River Basin was only 18, compared to the 30 rain gauge stations ~~and 170 grid points~~ provided by CMA; ~~hence, the number of CHIRP stations limited the accuracy of spatial rainfall estimates~~ (Fig. 2).

### 3 Methods

#### 3.1 The WHU-SGCC approach

In this study, the approach of the WHU-SGCC is to estimate the precipitation for every pixel by blending satellite estimates and rain gauge observations considering the terrain factors and precipitation characteristics. There were ~~five-four~~ steps to establish the numerical relationship between gauged stations and the corresponding satellite pixels, and interpolation for the remaining pixel ~~other pixels~~. On this basis, the WHU-SGCC method identifies the geographical locations and topographical features of each pixel and applies the four classification and blending rules. A flowchart of the WHU-SGCC method is shown in Fig. 3. The proposed approach was evaluated over the Jinsha River Basin based on 30 gauge stations and CHIRP satellite-based precipitation estimations during the JJA from 1990 to 2014. The leave-one-out cross validation step was applied to computing the out-of-sample adjusted error with gauge stations.

~~On this basis, the WHU-SGCC method identifies the geographical locations and topographical features of each pixel and applies the classification principles of the SICR approach, including five classification and blending rules.~~ The basic description of the WHU-SGCC method is given below, with details illustrated separately in later sections:-

1) ~~A flowchart of the WHU-SGCC method is shown in Fig. 3. The proposed approach was evaluated for the Jinsha River Basin for JJA 2016. From that data, the training samples represented 70% of total gauged stations and gridded points, and the remaining data were used to verify the model performance. The proposed approach was evaluated for the Jinsha River Basin for the JJA 2016.~~ Classify all regional pixels into five-four types: C1 (pixel including one gauged station in its area), C2 (pixel including one gridded point), C3 ~~C2~~ (pixel statistically physically similar to C1 ~~C2~~), ~~C4 C3~~ (pixel statistically physically similar to ~~C3 C2~~) and ~~C5 C4~~ (remaining pixels).

2) Analyse the relationships between precipitation observations and the C1, C2, and C3 pixel types, and with the C4 ~~and C5~~ pixels. These relationships are described by five-four rules, detailed below as Rules 1 through ~~54~~.

3) ~~Bias-adjust-establish~~ Establish regression models and screen target pixels based on the five aforementioned rules.

4) Correct all precipitation pixels in daily regional precipitation images.

带格式的: 缩进: 首行缩进: 0.36 厘米

带格式的: 字体: (默认) Times New Roman, (中文) 宋体, 10 磅

5) A flowchart of the WHU-SGCC method is shown in Fig. 3. The proposed approach was evaluated for the Jinsha River Basin for JJA 2016. From that data, the training samples represented 70% of total gauged stations and gridded points, and the remaining data were used to verify the model performance.

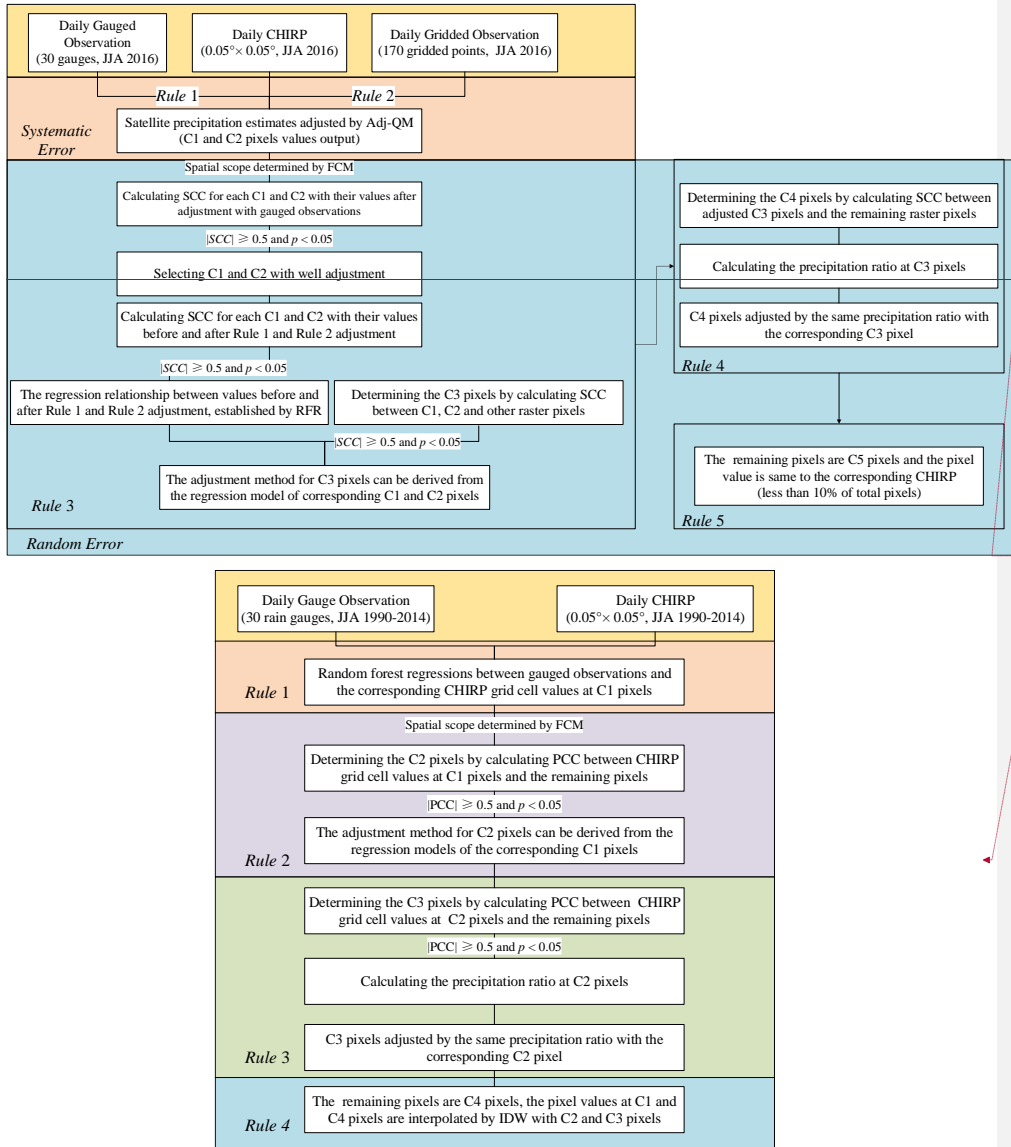

Figure 3 Flowchart of the WHU-SGCC approach with the five-four rules applied in this study.

### 3.1.1 Assumptions

- 1) Gauge and gridded point observations are the most accurate, or “true”, values for reference purposes.
- 2) No major terrain change occurred during the twenty years.
- 3) Spearman's-Pearson's Correlation Coefficient (SCCPCC) can indicate the statistically similarity of rainfall characteristics



among pixels over a seasonal scale.

### 3.1.2 Rule 1 of the WHU-SGCC method

In general, satellite precipitation estimations deviated from ground-based measurements, which were assumed to be the true values. Rule 1 adjusts the biases in the satellite estimations. For every C1, its precipitation value was derived from a quantile mapping (QM) approach. It has been shown that the QM method is the best for reducing systematic biases of regional satellite precipitation estimates because of its independence from predetermined functions (Themessl et al., 2011; Chen et al., 2013).

QM is a nonparametric empirical approach that considers a time-dependent correction function. This approach is designed to transform the cumulative distribution function (CDF) of satellite data into the CDF of data at each station.

$$Y_o = h(Y_s) \quad (1)$$

where the variable  $Y_s$  is the distribution of the observed variable  $Y_o$ . In this study  $Y_o$  denotes each gauge or gridded precipitation data point location from CMA and  $Y_s$  denotes the corresponding CHIRP grid cell value. The objective of QM is to correct the daily precipitation amount from a climate simulation and the transformation  $h$  is defined in Eq. (2):

$$Y_o = H_o^{-1}(H_s(Y_s)) \quad (2)$$

where the  $H_s$  is the CDF of  $Y_s$  and  $H_o^{-1}$  is the inverse CDF (or quantile function) corresponding to  $Y_o$  (Gudmundsson et al., 2012).

Notably, we separately calculate CDFs at each gauge and gridded pixel using the historical daily rainfall from the JJA in 2016.

The result of a QM adjustment is  $\bar{Y}_{QM}$ , which is approximately the same as the CDF of the gauge observations on a seasonal scale, which is distinct from daily data. The suitable scale of the CDF is seasonal because the QM cannot effectively remove the day-by-day random errors in CHIRP estimates. Therefore, on the basis of  $\bar{Y}_{QM}$ , the adjustment result,  $\hat{C1}_{as}$ , for each C1 pixel is derived from the minimum absolute value of the difference between the gauge observations and satellite estimations before and after applying the QM adjustment, referred to as the adjusted QM (Adj-QM) method, as shown in Eq. (3)–Eq. (5).

$$D_{QM} = |\bar{Y}_{QM} - Y_o| \quad (3)$$

$$D_s = |Y_s - Y_o| \quad (4)$$

$$\hat{C1}_{as} = \begin{cases} \bar{Y}_{QM}, & D_{QM} \leq D_s \\ Y_s, & D_s < D_{QM} \end{cases} \quad (5)$$

where  $D_{QM}$  is the absolute value of the difference between  $\bar{Y}_{QM}$  and  $Y_o$ , and  $D_s$  is the absolute value of difference between  $\bar{Y}_s$  and  $Y_o$ .

In general, satellite precipitation estimations deviated from ground-based measurements observed data, which were assumed to be the true values. Rule 1 aims to establish a regression model between each gauge historical observations and the corresponding CHIRP grid cell value. The regression relationship was derived by random forest regression (RFR) at each gauge station. RFR is a machine-learning algorithm for a predictive model with a large set of regression trees in which each tree in the ensemble is grown from a bootstrap (Johnson, 1998) sample drawn with replacement from the training set. The final prediction is obtained by combining the results of the prediction methods applied to each bootstrap sample (Genuer et al., 2017). The predicted value is calculated by the mean of all trees.

$$Y_o = f_{RFR}(Y_s) \quad (1)$$

where  $Y_o$  denotes each gauge historical observations and  $Y_s$  denotes the corresponding CHIRP grid cell values at C1 pixels.  $f_{RFR}$  is constructed from the time series  $Y_o$  (dependent variable) and  $Y_s$  (independent variable) by means of RFR. The number of decision trees was set to 500, which was determined by out-of-bag (OOB) error (Figure S1). The OOB error

带格式的: 字体: 10 磅

reached the minimum value when the number of decision trees was less than 500.

The Rule 1 builds the statistical relationships between gauge observations and corresponding CHIRP grid cell values, which is the key idea in correcting the satellite-based precipitation estimations in the whole study area. As there are 30 gauge stations in the study area, 30 regression relationships at C1 pixels were derived from Rule1. The values of C1 pixels are not corrected in Rule 1, but interpolated in Rule 4.

### 3.1.3 Rule 2 of the WHU-SGCC method

Commonly, a few of the national standard stations have free access, and these stations are unevenly distributed and do not satisfied the accuracy needed for regional precipitation estimation. Under these circumstances, the gridded precipitation data developed by CMA are applied as the supplementary data for observations with uniform spatial distribution. Therefore, Rule 2 is same as Rule 1 with different input data.  $\hat{C}_{2_{am}}$  is the adjusted target precipitation of one C2 pixel.

### 3.1.4-3 Rule 32 of the WHU-SGCC method

It is reasonable to assume that there are some pixels that are statistically physically similar to the precipitation characteristics of C1 pixels in a certain spatial scope. Therefore, it is feasible to adjust the satellite estimation bias of C3-C2 pixels by referring to the appropriate regression relationships at corresponding C1 pixels based on Rule 1.

First, the spatial scope in which pixels may have highly similar characteristics is established. Some studies indicate that geographical location, elevation and other terrain information influences the spatial distribution of rainfall, especially in mountainous areas with complex topography (Anders et al., 2006; Long and Singh, 2013). The size of the spatial range is an important parameter to distinguish spatial similarity and heterogeneity. In the WHU-SGCC method, the approach of fuzzy c-means (FCM) clustering was explored to determine the spatial range considered as each pixel's terrain factors including longitude, latitude, elevation, slope, aspect and curvature. FCM method was developed by J.C. Dunn in 1973 (Dunn, 1973), and improved in 1983 (Wang, 1983). It is an unsupervised fuzzy clustering method and the steps are as follows (Pessoa et al., 2018):

1) Choose the number of clusters  $c$ . The optimum number of clusters was determined by  $L(c)$  which was derived from the inter-distance and inner-distance of elements samples in Eq. (2). It is ensured that the distance between the same samples is smaller, while the distance between the different samples is larger.

$$L(c) = \frac{\sum_{i=1}^c \sum_{j=1}^n w_{ij}^m \|c_i - \bar{x}\|^2 / (c-1)}{\sum_{i=1}^c \sum_{j=1}^n w_{ij}^m \|x_j - c_i\|^2 / (n-c)} \quad (2)$$

In Eq. (2), the denominator is inner-distance and the molecular is inter-distance. The initial value of  $c$  is 1 and the maximum value of  $c$  is the number of gauge stations in this study area. The optimum number of clusters was optimized to maximize the  $L(c)$ . For this reason,  $c$  value is conducted in the range of 1 to the number of gauge stations with an incremental interval value of 1 in this study.

2) Assign coefficients randomly to each data point  $x_i$  for the degree to which it belongs in the  $j$ th cluster  $w_{ij}(x_i)$ :

3)

带格式的: 字体: 非倾斜

带格式的: 字体: 倾斜

带格式的: 字体: 倾斜

带格式的: 缩进: 左侧: 0 厘米, 首行缩进: 0.36 厘米

域代码已更改

带格式的: 字体: 倾斜

带格式的: 字体: 倾斜

带格式的: 字体: (默认) Times New Roman, (中文) 宋体, 10 磅

带格式的: 正文, 无项目符号或编号

带格式的: 字体: (默认) Times New Roman, (中文) 宋体, 10 磅

带格式的: 正文, 无项目符号或编号

$$c_i^{(t)} = \frac{\sum_{j=1}^n w_{ij}^m x_j}{\sum_{j=1}^n w_{ij}^m} \quad (63), \quad w_{ij} = \frac{1}{\sum_{k=1}^c \left( \frac{\|x_i - c_i\|}{\|x_i - c_k\|} \right)^{\frac{2}{m-1}}} \quad (74), \quad \bar{x} = \frac{\sum_{i=1}^c \sum_{j=1}^n w_{ij}^m x_j}{n} \quad (5)$$

带格式的: 行距: 单倍行距

域代码已更改

where  $x$  is a finite collection of  $n$  elements that will be partitioned into a collection of  $c$  fuzzy clusters,  $c_i$  is the centre of each cluster,  $m$  is the hyper-parameter that controls the level of cluster fuzziness and  $w_{ij}$  is the degree to which element  $x_i$  belongs to  $c_i$  and  $\bar{x}$  is the center vector of collection. In Eq. (63),  $c_j^{(t)}$  represents the cluster centre in iteration  $t$ . If the minimum improvement in objective function between two consecutive iterations satisfies the following equation, the algorithm terminates in iteration  $t$  (Eq. (6)):

$$\|c_i^{(t)} - c_i^{(t+1)}\| < \varepsilon \quad (6)$$

带格式的: 右, 允许文字在单词中间换行

域代码已更改

2)3) Minimize the objective function  $F_c$  to achieve data partitioning.

$$F_c = \sum_{j=1}^n \sum_{i=1}^c w_{ij}^m \|x_j - c_i\|^2 \quad (87)$$

The results of FCM are the degree of membership of each pixel to the cluster centre as represented by numerical value. Pixels in each cluster have similar terrain features and precipitation characteristics.

Second, the adjusted C1 and C2 are employed. SCC was used as the evaluation index for each C1 and C2 with their values after adjustment and gauge observations in JJA:

$$SCC = \frac{\sum_{i=1}^n (rgx_i - rg\bar{x})(rgy_i - rg\bar{y})}{\sqrt{\sum_{i=1}^n (rgx_i - rg\bar{x})^2} \sqrt{\sum_{i=1}^n (rgy_i - rg\bar{y})^2}} \quad (9)$$

Spearman's correlation coefficient is defined as Pearson's correlation coefficient between the ranked variables, and it assesses monotonic relationships (whether linear or not) where  $n$  is the number of data points in each set, which was the number of each C1 or C2 in the historical JJA dataset.  $x_i$  is the  $i$ th data value in the first data set (satellite estimations after Rule 1 and Rule 2 adjustment,  $\hat{C}_{1_{as}}$  and  $\hat{C}_{2_{as}}$ ),  $x_i$  is converted to its rank  $rgx_i$ , and  $rg\bar{x}$  is its average value. Similar definitions exist for  $rgy_i$  and  $rg\bar{y}$  (gauge and gridded observations at C1 and C2 pixels,  $Y_g$ ). The value range of the SCC is between -1 and +1. If there are no repeated data values, a perfect SCC of +1 or -1 occurs when each of the variables is a perfect monotone function of the other. However, if the value is close to zero, there is zero correlation. In addition, correlation is not only determined by the value of the correlation coefficient but also from the correlation test's  $p$  value. The critical value is 0.05, thus a  $p$  lower than 0.05 indicates the data are significantly correlated. Therefore, the C1 and C2 pixels selected for Rule 3 must meet the following criteria:

$$|SCC| \geq 0.5 \text{ and } p < 0.05 \quad (10)$$

Third, the filtered C1 and C2 pixels after adjustment is used to establish a regression model between the historical  $\hat{C}_{1_{as}}$ ,  $\hat{C}_{2_{as}}$  and  $Y_g$ . To ensure high accuracy, it is necessary to calculate the SCC and  $p$  values between  $\hat{C}_{1_{as}}$ ,  $\hat{C}_{2_{as}}$  and  $Y_g$ , and complete the filtering criteria described above in Eq. (7) before building the regression model. The regression relationship was

derived by random forest regression (RFR). RFR is a machine learning algorithm for a predictive model with a large set of regression trees in which each tree in the ensemble is grown from a bootstrap (Johnson, 1998) sample drawn with replacement from the training set. The final prediction is obtained by combining the results of the prediction methods applied to each bootstrap sample (Genuer et al., 2017). The predicted value is calculated by the mean of all trees.

$$\hat{C1}_{as} \text{ or } \hat{C2}_{as} = f_{RFR}(Y_s) \quad (11)$$

where  $f_{RFR}$  is constructed from the time series  $\hat{C1}_{as}$  or  $\hat{C2}_{as}$  (dependent variable) and the corresponding  $Y_s$  data (independent variable) at filtered C1 and C2 pixels in JJA by means of RFR. The number of decision trees was set at the default value of 500.

Fourth, as mentioned above, the aim of Rule 3 is to derive an adjustment method for C3 pixels based on learning from Rule 1 and Rule 2. With the establishment of a regression relationship between values before and after adjustment of the C1 and C2 pixels by RFR method, the determination of C3 pixels follows a considerable procedure. Pixels in each cluster represent potential C3 pixels, with exception of the C1 and C2 pixels and are called R pixels. Spearman's  $r$  and  $p$  values between the satellite estimations (CHIRP grid cell values) at R pixels and the C1 and C2 pixels are the criteria for final determination of C3 pixels. Each R pixel has  $m$  SCC and  $p$  values (the number of C1 and C2 pixels in the cluster), and the subset of C3 pixels is identified by excluding the data that failed the correlation test and retaining both the data with a maximum SCC of at least 0.5 and the corresponding index of C1 and C2 pixels. The selected C3 pixels are statistically similar to the precipitation characteristics of corresponding C1 and C2 pixels in their defined spatial scope.

After identifying the C3 pixels and their corresponding C1 and C2 pixels, the adjustment method for C3 pixels is derived from the regression model for the C1 and C2 pixels.

$$\hat{C3}_{as} = f_{RFR}(Y_s) \quad (12)$$

where  $\hat{C3}_{as}$  is the adjusted satellite precipitation estimate and  $Y_s$  is the CHIRP grid cell value for the C3 pixels, and  $f_{RFR}$  is the  $f_{RFR}$  of corresponding C1 and C2 pixels.

Second, as mentioned above, the aim of Rule 2 is to derive an adjustment method for C2 pixels based on learning from Rule 1. With the establishment of a regression relationship between gauge observations and the corresponding CHIRP grid cell values of the C1 pixels by RFR method, the determination of C2 pixels follows a considerable procedure. With exception of the C1 pixels, the remaining pixels in each cluster represent potential C2 pixels called R pixels. Pearson's correlation coefficient (PCC) and  $p$ -values between the satellite estimations (CHIRP grid cell values) at R pixels and the C1 pixels are the criteria for final determination of C2 pixels. The PCC is defined as follows:

$$PCC_{x,y} = \frac{\sum_{i=1}^n (x_i - \bar{x})(y_i - \bar{y})}{\sqrt{\sum_{i=1}^n (x_i - \bar{x})^2} \sqrt{\sum_{i=1}^n (y_i - \bar{y})^2}} \quad (8)$$

where  $n$  is the number of samples,  $x_i$  and  $y_i$  are individual samples (CHIRP grid cell values at C1 and C2 pixels),  $\bar{x}$  is the arithmetic mean of  $x$  calculated by  $\bar{x} = \frac{1}{n} \sum_{i=1}^n x_i$ ,  $\bar{y}$  is the arithmetic mean of  $y$  calculated by  $\bar{y} = \frac{1}{n} \sum_{i=1}^n y_i$ .

The value range of the PCC is between -1 and +1. If there are no repeated data values, a perfect PCC of +1 or -1 occurs when each of the variables is a perfect monotone function of the other. However, if the value is close to zero, there is zero correlation. In addition, correlation is not only determined by the value of the correlation coefficient but also from the correlation test's  $p$ -value. The critical values for PCC and  $p$ -value are 0.5 and 0.05, thus a PCC value higher than 0.5 and a  $p$ -value lower than 0.05 indicate the data are significantly correlated (Zhang and Chen, 2016). Therefore, the final determination

带格式的: 字体: 非倾斜

带格式的: 字体: 非倾斜

带格式的: 右

域代码已更改

带格式的: 字体: (默认) Times New Roman, (中文) 宋体

域代码已更改

域代码已更改

域代码已更改

带格式的: 字体: 倾斜

域代码已更改

带格式的: 字体: (默认) Times New Roman

域代码已更改

带格式的: 字体: (默认) Times New Roman

带格式的: 字体: 倾斜

带格式的: 字体: (默认) Times New Roman

域代码已更改

带格式的: 字体: 非倾斜

带格式的: 字体: 非倾斜

带格式的: 字体: 倾斜

带格式的: 字体: 非倾斜

of C2 pixels must meet the following criteria:

$$|PCC| \geq 0.5 \quad \text{and} \quad p < 0.05 \quad (9)$$

Each R pixel has  $m$  PCC and  $p$ -values (the number of C1 pixels in the cluster), and the subset of C2 pixels is identified by excluding the data that failed the correlation test and retaining both the data with a maximum PCC of at least 0.5 and a  $p$ -value lower than 0.05, and the corresponding index of C1 pixels. The selected C2 pixels are statistically similar to the precipitation characteristics of corresponding C1 pixels in their defined spatial scope.

After identifying the C2 pixels and their corresponding C1 pixels, the adjustment method for C2 pixels is derived from the regression model for the C1 pixels.

$$C2_{as} = f_{RFRc}(Y_s) \quad (10)$$

where  $C2_{as}$  is the adjusted satellite precipitation estimate and  $Y_s$  is the CHIRP grid cell value at the C2 pixels, and  $f_{RFRc}$  is the  $f_{RFR}$  of corresponding C1 pixel.

### 3.1.5.4 Rule 4.3 of the WHU-SGCC method

Recognizing that precipitation has a spatial distribution, the assumption that C4-C3 pixels are statistically physically similar to the precipitation characteristics of C3-C2 pixels was adopted to establish the adjustment method for C4-C3 pixels.

First, the determination of C4-C3 pixels in each spatial cluster is based on the selection of C3-C2 pixels. The satellite-based estimation values for at the remaining regional pixels with exception of the C1 and C2 pixels are used to calculate the SCC PCC and  $p$ -values with the satellite-based estimation values  $Y_s$  for at the C3-C2 pixels in the same cluster of the JJA dataset. The results of each pixel's  $k$  SCC PCC and  $p$ -value (the number of C3-C2 pixels in the cluster) are evaluated based on the correlation test (Eq. (9)), and that the pixels with a maximum SCC PCC of is at least 0.5, as well as and then the corresponding index of C3-C2 pixels are retained. The selected pixels called C4-C3 pixels, which are statistically physically similar to the precipitation characteristics of the corresponding C3-C2 pixels in the defined spatial scope.

After identifying the C4-C3 pixels, a method for merging method the merging the CHIRP grid cell values at C4-C3 pixels ( $Y_s$ ) and the target reference values of  $C3_{as} - C2_{as}$  at the corresponding C3-C2 pixels was applied to estimate the adjusted precipitation values for at C4-C3 pixels. This method combines  $Y_s$  and  $C3_{as} - C2_{as}$  values in one variable, as shown in Eq. (4.11):

$$w_i = \frac{C2_{as_i} + \lambda}{Y_{s_i} + \lambda} \quad i=1, \dots, n \quad (4.11)$$

where  $\lambda$  is a positive constant set to 10 mm (Sokol, 2003),  $C3_{as} - C2_{as}$  is the adjusted precipitation values for at the C3-C2 pixels,  $Y_{s_i}$  is extracted from the CHIRP grid cell values at for the pixel corresponding location of with the C3-C2 pixel, and  $n$  is the number of C3-C2 pixels in each spatial cluster.

Each  $w$  of the C4-C3 pixels is assigned the same value as the corresponding C3-C2 pixel. Therefore, the values of C4-C3 pixels are derived from Eq. (4.12):

$$C3_{as} = \max(w \times (Y_s + \lambda) - \lambda, 0) \quad (4.12)$$

where  $C4_{as} - C3_{as}$  is the adjusted target precipitation value at one C4-C3 pixel and  $Y_s$  is the corresponding CHIRP grid cell value. To avoid precipitation estimates below 0, Eq. (4.12) sets these negative values to 0.

If there is no C3 pixels in a spatial cluster, the C4 pixels are assumed to be physically similar to the precipitation characteristics of the C1 and C2 pixels and adjusted by the above method in Rule 4.

域代码已更改

带格式的: 字体: 非倾斜

带格式的: 字体: 非倾斜

域代码已更改

域代码已更改

带格式的: 字体: 非倾斜

域代码已更改

域代码已更改

域代码已更改

域代码已更改

### 3.1.6 Rule 5 of the WHU-SGCC method

Excluding the C1, C2, C3 and C4 pixels, the number of remaining pixels, called C5 pixels, is less than 10% of the total number of pixels, and each C5 pixel value ( $C5_{as}$ ) is set to be the same as the CHIRP grid cell value at the corresponding position.

In the end, after applying these five rules, we obtained complete daily adjusted regional precipitation maps for the summer (JJA) 2016.

### 3.1.6 Rule 5 of the WHU-SGCC method

Excluding the C1, C2, C3 and C4 pixels, the number of remaining pixels, called C5 pixels which are adjusted by Inverse Distance Weighted (IDW). IDW is based on the concept of the first law of geography from 1970. It was defined as everything is related to everything else, but near things are more related than distant things. Therefore, the attribute value of an unsampled point is the weighted average of known values within the neighbourhood and the distance weighting can be determined by IDW (Lu and Wong, 2008). In Rule 4, IDW is used to interpolate the unknown spatial precipitation data from the C2 and C3 pixels adjusted precipitation values. The IDW formulas are given as Eq. (13) and Eq. (14).

$$R_{as} = \sum_{i=1}^n w_i R_i \quad (13)$$

$$w_i = \frac{d_i^{-\alpha}}{\sum_{i=1}^n d_i^{-\alpha}} \text{ with } \sum_{i=1}^n w_i = 1 \quad (14)$$

where  $R_{as}$  is the unknown spatial precipitation data,  $R_i$  is the adjusted precipitation values at C2 and C3 pixels,  $n$  is the number of C2 and C3 pixels,  $d_i$  is the distance from each C2 or C3 pixel to be unknown grid cell,  $\alpha$  is the power which is generally specified as a geometric form for the weight. Several researches (e.g., Simanton and Osborn 1980; Tung 1983) have experimented with variations in a power, the small  $\alpha$  tends to estimate values with the averages of sampled grids in the neighbourhood, while large  $\alpha$  tends to give larger weights to the nearest points and increasingly down-weights points farther away (Chen and Liu, 2012; Lu and Wong, 2008). The value of  $\alpha$  has an influence on the spatial distribution of information from precipitation observations. For this reason,  $\alpha$  value is conducted in the range of 0.1 to three (0.1, 0.3, 0.5, 1.0, 1.5, 2.0, 2.5 and 3.0) in this study.

It is noted that the unknown spatial precipitation data including C1 and C4 pixels, because C1 pixels values were not adjusted in Rule 1.

, is less than 10% of the total number of pixels, and each C5 pixel value ( $C5_{as}$ ) is set to be the same as the CHIRP grid cell value at the corresponding position.

In the end, after applying these five rules, we obtained complete daily adjusted regional precipitation maps for the summer (JJA) 2016 over the JinSha River basin.

### 3.2 Accuracy assessment

The performance of the WHU-SGCC adjusted precipitation estimates was evaluated by nine statistical indicators: Spearman's correlation coefficient (SCC), Pearson's correlation coefficient (PCC), root mean square error (RMSE), mean absolute error (MAE), relative bias (BIAS), the Nash-Sutcliffe efficiency coefficient (NSE), probability of detection (POD) and false alarm ratio (FAR) and critical success index (CSI). SCC, PCC, RMSE, MAE and BIAS were used to evaluate how well the WHU-SGCC method adjusted satellite estimation bias, while POD, FAR and CSI were used to evaluate the precipitation event

带格式的: 字体: 倾斜

带格式的: 右, 允许文字在单词中间换行

域代码已更改

域代码已更改

域代码已更改

带格式的: 右

域代码已更改

带格式的: 字体: 倾斜

域代码已更改

域代码已更改

域代码已更改

域代码已更改

域代码已更改

域代码已更改

域代码已更改

域代码已更改

域代码已更改

带格式的: 缩进: 首行缩进: 0 厘米

predictions (Su et al., 2011). SPCC measures strength of the nonlinear-correlation relationship between the satellite estimations and observations. MAE represents the average magnitude of error estimations, considering both systematic and random errors. The NSE (Nash and Sutcliffe, 1970) determines the relative magnitude of the variance of the residuals compared to the variance of the observations, bounded by minus infinity to 1. A negative value indicates a poor precipitation estimate and the value of an optimal estimate is equal to 1. BIAS measures the mean tendency of the estimated precipitation to be larger (positive values) or smaller (negative values) than the observed precipitation, with an optimal value of 0.

POD, also known as the hit rate, represents the probability of rainfall detection. FAR is defined as the ratio of the false detection of rainfall to the total number of rainfall events. All of the accuracy assessment indices are shown as-in Table 3.

**Table 3** Accuracy assessment indices.

| Accuracy assessment Index                                     | Unit | Formula                                                                                                                                                 | Range    | Optimal value |
|---------------------------------------------------------------|------|---------------------------------------------------------------------------------------------------------------------------------------------------------|----------|---------------|
| <del>Spearman's</del> Pearson's Correlation Coefficient (SCC) | NA   | $SCC = \frac{\sum_{i=1}^n (Y_{oi} - \bar{Y}_o)(C_i - \bar{C})}{\sqrt{\sum_{i=1}^n (Y_{oi} - \bar{Y}_o)^2} \cdot \sqrt{\sum_{i=1}^n (C_i - \bar{C})^2}}$ | [-1,1]   | 1             |
| Root Mean Square Error (RMSE)                                 | Mm   | $RMSE = \sqrt{\frac{1}{n-1} \sum_{i=1}^n (C_i - Y_{oi})^2}$                                                                                             | [0,+∞)   | 0             |
| Mean Absolute Error (MAE)                                     | Mm   | $MAE = \frac{1}{n} \sum_{i=1}^n  C_i - Y_{oi} $                                                                                                         | [0, +∞)  | 0             |
| Relative Bias (BIAS)                                          | NA   | $BIAS = \frac{\sum_{i=1}^n (C_i - Y_{oi})}{\sum_{i=1}^n Y_{oi}}$                                                                                        | (-∞, +∞) | 0             |
| Nash-Sutcliffe Efficiency Coefficient (NSE)                   | NA   | $NSE = 1 - \frac{\sum_{i=1}^n (C_i - Y_{oi})^2}{\sum_{i=1}^n (C_i - \bar{Y}_o)^2}$                                                                      | (-∞,1]   | 1             |
| Probability of Detection (POD)                                | NA   | $POD = H/(H+M)$                                                                                                                                         | [0,1]    | 1             |
| False Alarm Ratio (FAR)                                       | NA   | $FAR = F/(H+F)$                                                                                                                                         | [0,1]    | 0             |
| Critical Success Index (CSI)                                  | NA   | $CSI = H/(H+M+F)$                                                                                                                                       | [0,1]    | 1             |

Note:  $Y_{oi}$  is the observation data and  $C_i$  is the adjusted value using the WHU-SGCC method for test sample pixel;  $\bar{Y}_o$  is the arithmetic mean of  $Y_o$  and is given by  $\bar{Y}_o = \frac{1}{n} \sum_{i=1}^n Y_{oi}$ ;  $\bar{C}$  is the arithmetic mean of  $C$  and is given by  $\bar{C} = \frac{1}{n} \sum_{i=1}^n C_i$ ; H represents the number of both observed and estimated precipitation events (successfully forecasted), and F is the number of false alarms when observed precipitation was below the threshold and estimated precipitation was above threshold (false alarms). M is the number of events in which the estimated precipitation was below the threshold and observed precipitation was above the threshold (missed forecasts). POD and FAR values are dimensionless numbers ranging from 0 to 1. The precipitation threshold (event/no event) was set to 0.1 mm/day.

#### 4 Results and Discussion

There were 18482 daily pixels to be adjusted by blending satellite estimations (CHIRP) and observations (gauge stations and gridded points) using the WHU-SGCC approach during for the 92 days of JJA from 1990 to 20142016. The number of pixels of pixels adjusted by each rule in the WHU-SGCC method is shown in FigTable- 4. The number of C1 pixels was the number of training gauge stations accounting 0.16% of the total pixels (18482) inside the basin. Due to the leave-one-out cross validation step, the different training samples will have the different number of C2, C3 and C4 pixels respectively inside the Jinsha River Basins. The number of C4 pixels was approximately 10822 with the percentage around 60%, the number of C3 pixels was approximately 4331 with the percentage ranging from 21.72% to 24.40%, and the number of C2 pixels was approximately 3300 with the percentage ranging from 15.59% to 18.36%.



The number of C1 and C2 was nearly 140, as well as 11493 C3 pixels, approximately 6344 C4 pixels, and the number of remaining C5 pixels was no more than 5%.

**Table 4** The number of each class pixels adjusted by each rule using the WHU-SGCC method inside the Jinsha River Basin.

| <u>Validation<br/>gauge station</u> | <u>C1 Pixels<br/>(%)</u> | <u>C2 Pixels<br/>(%)</u> | <u>C3 Pixels<br/>(%)</u> | <u>C4 Pixels<br/>(%)</u> |
|-------------------------------------|--------------------------|--------------------------|--------------------------|--------------------------|
| 52908                               | 29 (0.16%)               | 3066 (16.59%)            | 4224 (22.85%)            | 11163 (60.40%)           |
| 56004                               | 29 (0.16%)               | 2882 (15.59%)            | 4111 (22.24%)            | 11460 (62.01%)           |
| 56021                               | 29 (0.16%)               | 3311 (17.91%)            | 4510 (24.40%)            | 10632 (57.53%)           |
| 56029                               | 29 (0.16%)               | 3338 (18.06%)            | 4447 (24.06%)            | 10668 (57.72%)           |
| 56034                               | 29 (0.16%)               | 3300 (17.86%)            | 4427 (23.95%)            | 10726 (58.03%)           |
| 56038                               | 29 (0.16%)               | 3209 (17.36%)            | 4014 (21.72%)            | 11230 (60.76%)           |
| 56144                               | 29 (0.16%)               | 3347 (18.11%)            | 4442 (24.03%)            | 10664 (57.70%)           |
| 56146                               | 29 (0.16%)               | 3183 (17.22%)            | 4480 (24.24%)            | 10790 (58.38%)           |
| 56152                               | 29 (0.16%)               | 3173 (17.17%)            | 4176 (22.59%)            | 11104 (60.08%)           |
| 56167                               | 29 (0.16%)               | 3362 (18.19%)            | 4346 (23.51%)            | 10745 (58.14%)           |
| 56247                               | 29 (0.16%)               | 3385 (18.32%)            | 4416 (23.89%)            | 10652 (57.63%)           |
| 56251                               | 29 (0.16%)               | 3301 (17.86%)            | 4348 (23.53%)            | 10804 (58.46%)           |
| 56257                               | 29 (0.16%)               | 3313 (17.93%)            | 4043 (21.88%)            | 11097 (60.04%)           |
| 56357                               | 29 (0.16%)               | 3352 (18.14%)            | 4390 (23.75%)            | 10711 (57.95%)           |
| 56374                               | 29 (0.16%)               | 3341 (18.08%)            | 4294 (23.23%)            | 10818 (58.53%)           |
| 56459                               | 29 (0.16%)               | 3345 (18.10%)            | 4334 (23.45%)            | 10774 (58.29%)           |
| 56462                               | 29 (0.16%)               | 3380 (18.29%)            | 4377 (23.68%)            | 10696 (57.87%)           |
| 56475                               | 29 (0.16%)               | 3345 (18.10%)            | 4344 (23.50%)            | 10764 (58.24%)           |
| 56479                               | 29 (0.16%)               | 3305 (17.88%)            | 4212 (22.79%)            | 10936 (59.17%)           |
| 56485                               | 29 (0.16%)               | 3393 (18.36%)            | 4419 (23.91%)            | 10641 (57.57%)           |
| 56543                               | 29 (0.16%)               | 3373 (18.25%)            | 4384 (23.72%)            | 10696 (57.87%)           |
| 56565                               | 29 (0.16%)               | 3241 (17.54%)            | 4450 (24.08%)            | 10762 (58.23%)           |
| 56571                               | 29 (0.16%)               | 3306 (17.89%)            | 4263 (23.07%)            | 10884 (58.89%)           |
| 56586                               | 29 (0.16%)               | 3387 (18.33%)            | 4434 (23.99%)            | 10632 (57.53%)           |
| 56651                               | 29 (0.16%)               | 3340 (18.07%)            | 4432 (23.98%)            | 10681 (57.79%)           |
| 56664                               | 29 (0.16%)               | 3368 (18.22%)            | 4262 (23.06%)            | 10823 (58.56%)           |
| 56666                               | 29 (0.16%)               | 3323 (17.98%)            | 4431 (23.97%)            | 10699 (57.89%)           |
| 56671                               | 29 (0.16%)               | 3356 (18.16%)            | 4367 (23.63%)            | 10730 (58.06%)           |
| 56684                               | 29 (0.16%)               | 3335 (18.04%)            | 4278 (23.15%)            | 10840 (58.65%)           |
| 56778                               | 29 (0.16%)               | 3347 (18.11%)            | 4277 (23.14%)            | 10829 (58.59%)           |

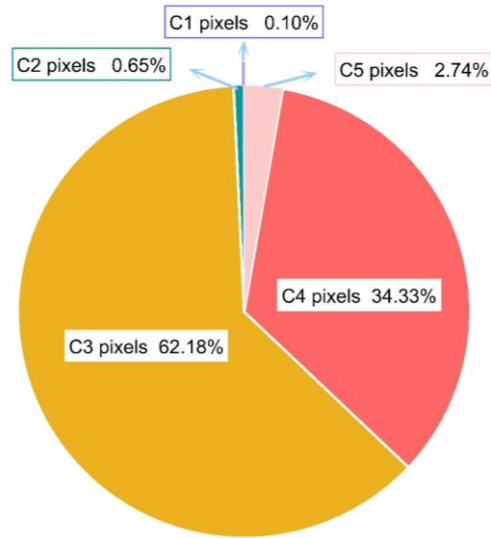

**Figure 4** The number of pixels adjusted by each rule using the WHU-SGCC method.

#### 4.1 CDFs of Rule 1 and Rule 2 results

Figure 5 shows the daily average precipitation for observations, CHIRP, C1 (Fig. 5 (a)) and C2 (Fig. 5 (b)) in JJA 2016. Compared to the gauge or grid observations, CHIRP estimations deviated from the observations in Jinsha River Basin. However, the adjusted values for the C1 and C2 pixels improved the estimates and approximated the observations with application of Rule 1 and Rule 2 of the WHU-SGCC method. This result demonstrates that Rule 1 and Rule 2 of WHU-SGCC method are effective in correcting consistent biases and considerably reduce the systematic biases of CHIRP. These improvements not only adjust the bias of satellite estimations but also preserve the original CHIRP pixel values which are close to the corresponding observed data. These adjustments provide reliable precipitation estimates for the C1 and C2 pixels, which supports further study using the WHU-SGCC method, especially for areas in which rain gauges are limited.

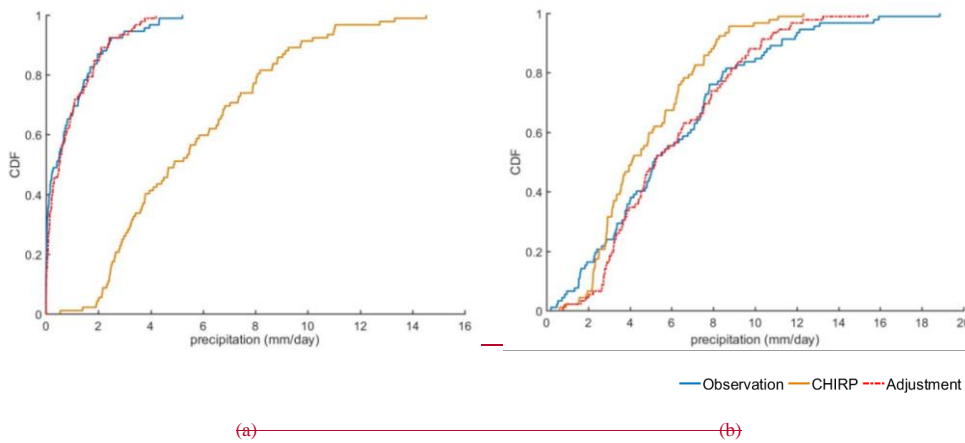

**Figure 5** CDFs of seasonal mean daily observations, CHIRP, C1 and C2 estimations for the Jinsha River Basin in JJA 2016

477

478 **4.2.1 Spatial Clustering from the FCM method of Rule 3 results**

479 To adjust the pixels other than for the gauged stations and gridded points, the pixels statistically physically similar to the C1  
480 and C2 pixels were selected. According to Rule 3, C3-C2 pixels were identified in a spatial scope defined by the FCM method.  
481 In the following experiments of Rule 2, we set the parameters  $m = 2, \varepsilon = 0.00001$  and the maximum number of iterations was  
482 set 1000 (an enough large value with the consideration of the algorithm efficiency). In order to determine the optimal numbers  
483 of clusters,  $c$  value was conducted in the range from 1 to 30 with an incremental interval value of 1 in this study. During the  
484 running of FCM approach, the values of  $L(c)$  were shown in Fig 4. Figure 4 shows the optimum number of clusters was 22,  
485 with the number of iterations was 690 less than the maximum number of iterations.

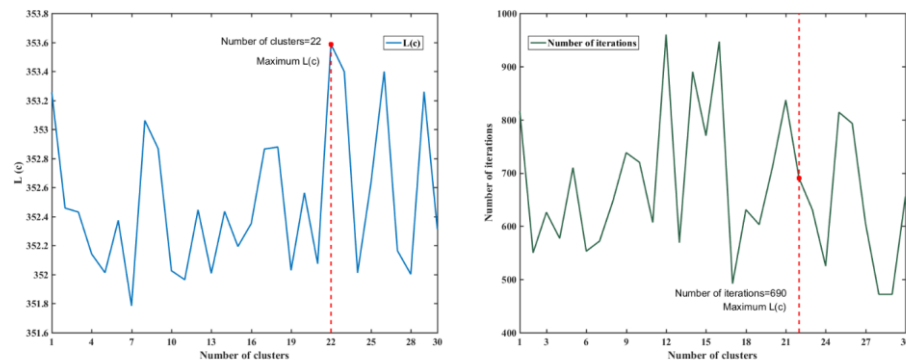

486

487 **Figure 4 .The optimum number of clusters determined by the maximum  $L(c)$  with the iterative process.**

488 Therefore, the number of clusters was set to 22 and the number of iterations was still set to 1000 for fully operations by means  
489 of FCM. The spatial clusters results with consideration of the terrain factors was shown in Fig. 5. Figure 6 shows the twenty  
490 spatial clusters with consideration of the terrain factors. Overall, the spatial results of FCM have many of the same  
491 characteristics as spatial areas defined by terrain changes, especially with respect to slope and runoff directions, which may  
492 influence regional rainfall to some extent.

批注 [S1]: 这一部分是否放到附录里

带格式的: 缩进: 首行缩进: 0.36 厘米

带格式的: 字体: (默认) Times New Roman, (中文) 宋体, 10 磅, 英语(英国)

域代码已更改

带格式的: 字体: 倾斜

带格式的: 字体: 倾斜

带格式的: 居中

带格式的: 字体: 小五, 加粗

带格式的: 段落间距段后: 10 磅, 行距: 单倍行距

带格式的: 字体: 小五

带格式的: 字体: 小五

带格式的: 字体: 小五

带格式的: 字体: 小五

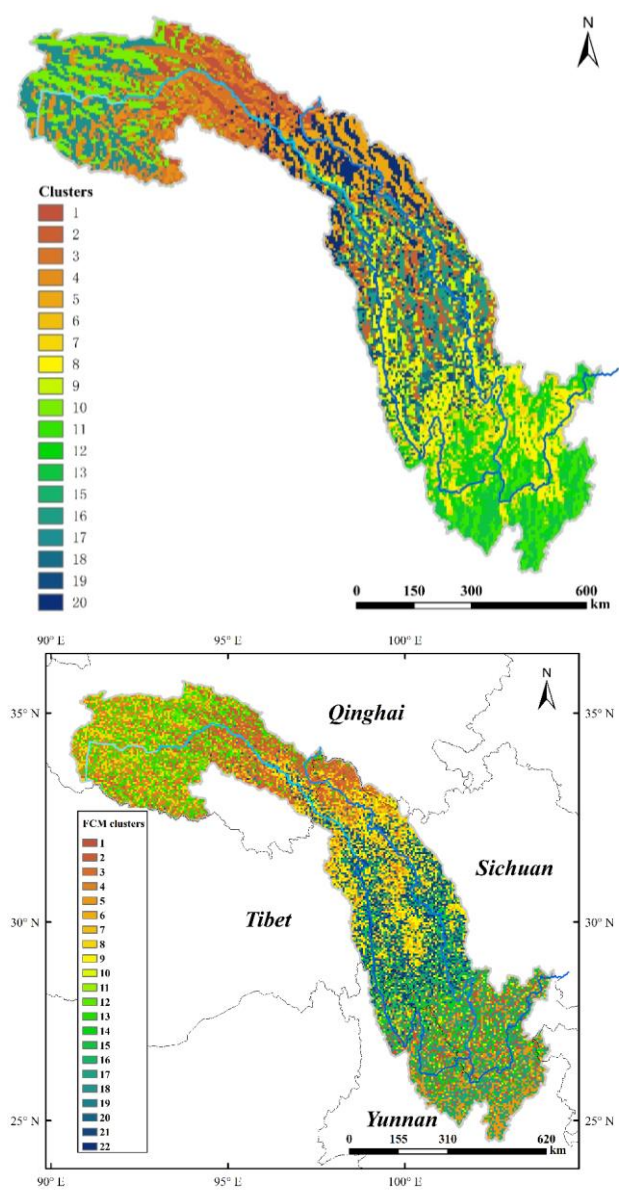

**Figure 6.5** Spatial clustering as defined by FCM for the Jinsha River Basin.

After Rule 3, each C3 pixel has a good SCC with a C1 or C2 pixel in its cluster; the statistical analysis is shown in Fig. 7. It was found that the average SCC value was 0.6. Therefore, the regression model established in Rule 3 for C1 and C2 before and after adjustment is applicable for each corresponding C3 pixel.

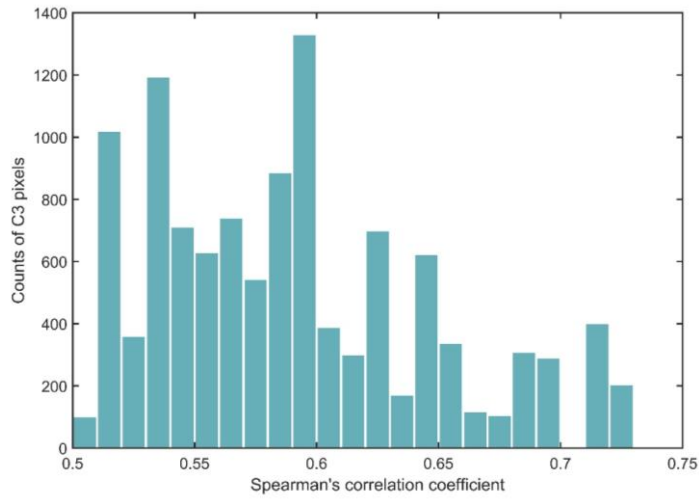

**Figure 7** Frequency distribution histogram for Spearman's correlation coefficient (SCC) for C3 pixels and their corresponding C1 and C2 pixels using Rule 3.

It is important to note that 62.18% of the pixels satellite precipitation estimates were adjusted by Rule 3 of the WHU-SGCC method. The accuracy assessment of C3 pixels is shown in Table 4. Validation statistics indicate that compared with the CHIRP and CHIRPS satellite estimations, the WHU-SGCC approach provides best adjustments based on all the statistical indicators at C3 pixels. With the improvement of precipitation accuracy by WHU-SGCC of C3 pixels, the adjustments of C4 pixels, which mainly rely on C3 pixel corrections, are reasonable.

**Table 4** Accuracy assessment of C3 pixels for JJA 2016.

| Statistic | WHU-SGCC | CHIRP   | CHIRPS  |
|-----------|----------|---------|---------|
| SCC       | 0.3518   | 0.3176  | 0.2476  |
| RMSE      | 5.1776   | 5.6686  | 7.0311  |
| MAE       | 3.5226   | 3.7353  | 4.6909  |
| BIAS      | -0.0831  | -0.2366 | -0.2404 |
| NSE       | -0.0590  | -0.2693 | -0.9528 |
| POD       | 1.0000   | 0.8900  | 0.3396  |
| FAR       | 0.0687   | 0.0749  | 0.0763  |
| CSI       | 0.9313   | 0.8302  | 0.3304  |

#### 4.3.2 Model performance based on overall accuracy evaluations

To test the performance of the WHU-SGCC method for precipitation estimates, the statistical analyses of SCCPCC, RMSE, BAE, BIAS, NSE, POD, FAR, and CSI were calculated and are presented in Table 5. (The results were derived from the  $\alpha$  = 0.1 for IDW in Rule 4 with the comparison with other values in RMSEs). Compared with the satellite images of CHIRP and CHIRPS, the results of the WHU-SGCC provide the greatest improvements for regional daily precipitation estimates over the Jinsha River Basin during in JJA from 1990 to 2016. After bias adjustment of the WHU-SGCC, SCC-PCC was improved by 17.383.34% and 39.6231.81% compared to CHIRP and CHIRPS, respectively. Meanwhile, the RMSE and MAE and BIAS of the WHU-SGCC decreased by 4.206.91% and 6.236.59% and 11.83% compared to CHIRP, and by 19.1022.71% and 24.4722.15% and 41.93% compared to CHIRPS. Although, the absolute value of BIAS of WHU-SGCC was no significant improvement than CHIRP and slightly higher than CHIRPS, all of the values were approximately to 0. This results of BIAS

域代码已更改

indicates that the all three kinds of data were much the same on the performance. Nevertheless, the NSE of the WHU-SGCC reached -0.01370.0864, an increase of 0.1093.33% and 0.6098.32% compared to CHIRP and CHIRPS, respectively. The NSE of WHU-SGCC was still far less than 1, but it was improved to be zero that indicates the adjusted results are close to the average level of the rain gauge observations, while the NSEs of CHIRP and CHIRPS were much worse. It is noted that the POD of WHU-SGCC was approximate to 1, better than CHIRP and CHIRPS, and the FAR of WHU-SGCC was 0.11, lower than CHIRP and CHIRPS, which represents the better ability on precipitation event predictions of the WHU-SGCC. not only was the POD improved to over 0.95, but the CSI was also improved to over 0.85, and all the FARs were approximately 0.11.

**Table 5** Overall accuracy assessment in JJA 2016.

| Statistic | WHU-SGCC | CHIRP   | CHIRPS  |
|-----------|----------|---------|---------|
| SCC       | 0.3006   | 0.2561  | 0.2153  |
| RMSE      | 8.3349   | 8.7003  | 10.3026 |
| MAE       | 4.4671   | 4.7641  | 5.9146  |
| BIAS      | -0.0529  | -0.0600 | -0.0911 |
| NSE       | -0.0864  | -0.1838 | -0.6599 |
| POD       | 0.9822   | 0.9230  | 0.3686  |
| FAR       | 0.1023   | 0.1122  | 0.1125  |
| CSI       | 0.8833   | 0.8266  | 0.3522  |

| Statistic | WHU-SGCC | CHIRP   | CHIRPS  |
|-----------|----------|---------|---------|
| PCC       | 0.2536   | 0.2454  | 0.1924  |
| RMSE      | 8.7608   | 9.4108  | 11.3354 |
| MAE       | 5.4564   | 5.8415  | 7.0088  |
| BIAS      | -0.0167  | -0.0443 | -0.0134 |
| NSE       | -0.0139  | -0.2083 | -0.8293 |
| POD       | 0.9932   | 0.9578  | 0.4351  |
| FAR       | 0.1146   | 0.2323  | 0.1601  |
| CSI       | 0.8799   | 0.7405  | 0.4010  |

#### 4.3 Model performance based on the spatial distributions

The spatial distributions of the statistical comparisons between observations and WHU-SGCC precipitation estimations are shown in Fig. 86. The variation of SCC-PCC as seen in Fig. 86 (a) shows that low correlations are observed in areas with lower elevation, particularly in the southern Jinsha River Basin where there is higher precipitation and a greater density of rain gauges. This result is in contrast to the result in (Rivera et al., 2018), because of the few days for heavy rains in this study area. However, the higher correlations noted over the north central area of the river basin are in a drier region with complex terrain and sparse rain gauges. With respect to the spatial distribution of RMSE, Fig. 8-6 (b) indicates that smaller errors are scattered in the northwest area of the river basin, with values lower than 5 mm, while the highest errors, which are over 20-10 mm, are located over the border between the lower reaches of the Jinsha Jiang River and the river basin. All the values of MAE are below 102 mm and the spatial behaviour is similar to that of the RMSE. Fig. 8-6 (c) shows that the lower MAE values are located over the mountainous region southwest of Qinghai and west of Sichuan, with values below 6 mm. The spatial distribution of the BIAS indicates that the WHU-SGCC has good agreement with the observations, with the most values ranging from -10%~10%. All the spatial distribution statistics indicate that the statistical relationships established during the process of the WHU-SGCC method is susceptible to the mode values of the rain gauge stations data. Although the average annual precipitation in the southern Jinsha River Basin was more than 600 mm (Fig.2), the days of light rain were still in the great percentage that

543 limited the performance over the south area, while there were sufficient data with similar precipitation features for WHU-  
 544 SGCC over the north data. Nevertheless, the WHU-SGCC approach is still effective in adjusting the satellite biases by blending  
 545 with the observations, particularly in the complicated mountainous region where there are higher  $SCC-PCC$  corresponding to  
 546 lower values of RMSE, MAE and BIAS. The lower  $SCC$  and higher errors located over the area southeast of the river basin  
 547 showed very limited improvement in precipitation estimates.

548  
 549

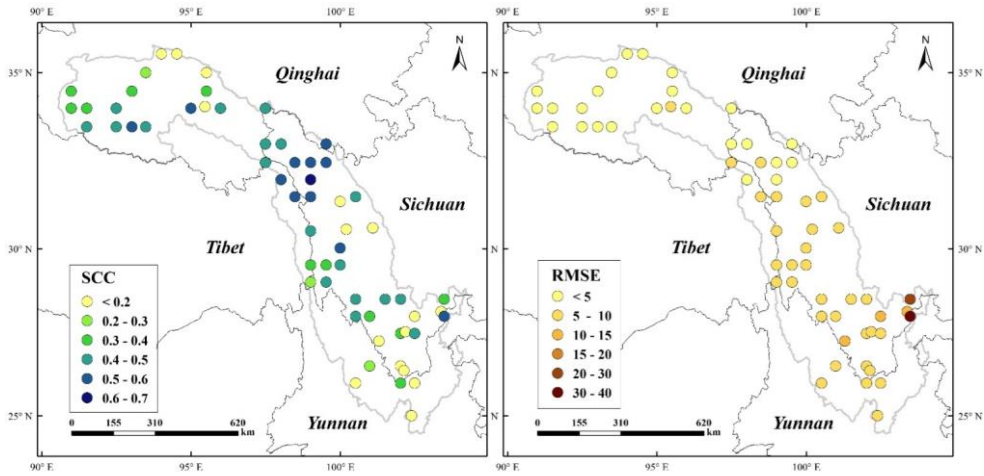

(a)

(b)

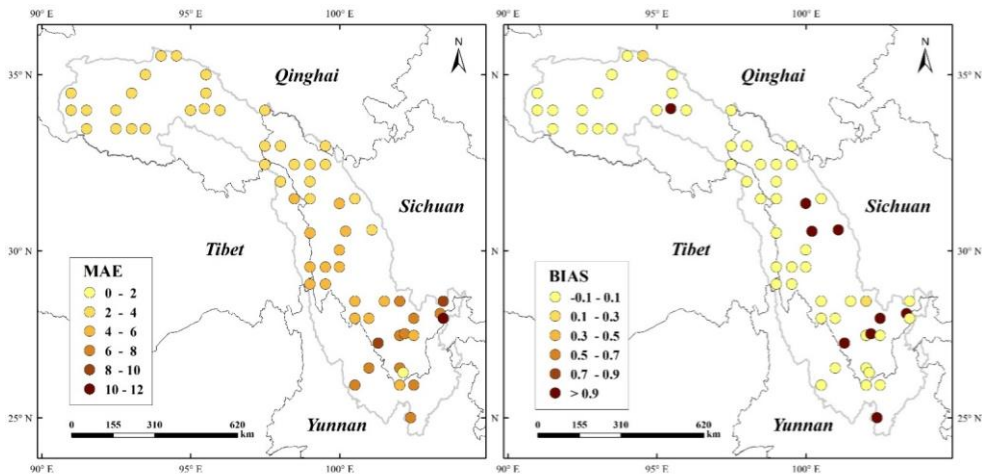

(c)

(d)

550  
 551



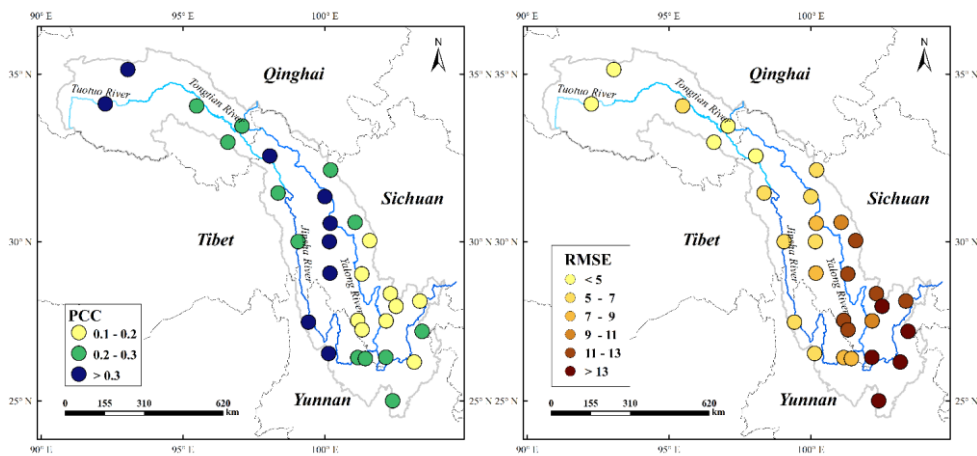

(a) (b)

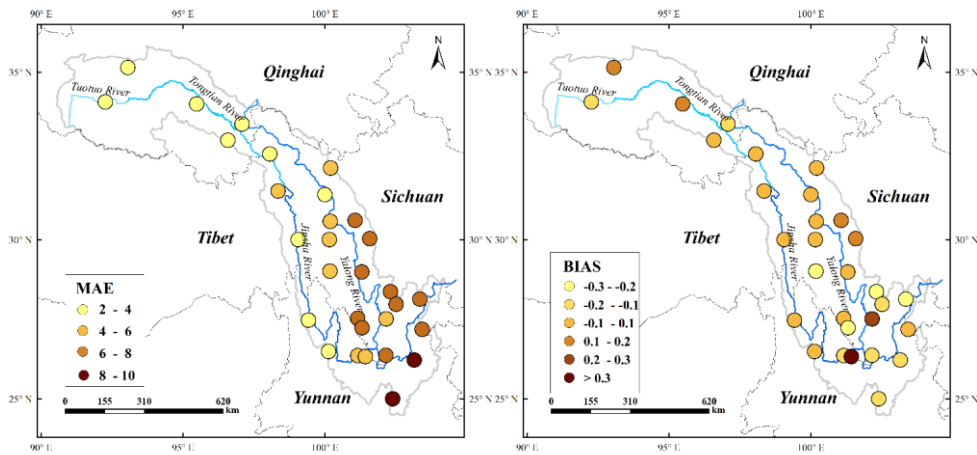

(c) (d)

**Figure 8.6** Spatial distribution of the statistical analyses of the overall agreement between observations and the WHU-SGCC estimations on leave-one-out cross validation 30% validation for JJA from 1990 to 2014-2016: a) Spearman's-Pearson's correlation coefficient, b) root mean square error c) mean absolute error, and d) relative bias.

#### 4.4 Model performance based on daily accuracy evaluations

After overall accuracy evaluations for JJA were conducted, further evaluations of daily accuracy were undertaken and the results are shown in Fig. 9. The evaluation of daily accuracy indicates that the WHU-SGCC reduces errors and biases compared to CHIRP and CHIRPS, with especially greatly decreases compared to CHIRPS. The RMSE and MAE derived from the WHU-SGCC were reduced by approximately 5% and 30% compared to CHIRP and CHIRPS, respectively. However, the greatest reduction was reflected in the BIAS, with at least an 18% and 30% reduction compared to CHIRP and CHIRPS, respectively. Therefore, the WHU-SGCC approach is effective for adjustments of daily precipitation estimates, and improves estimate performance.

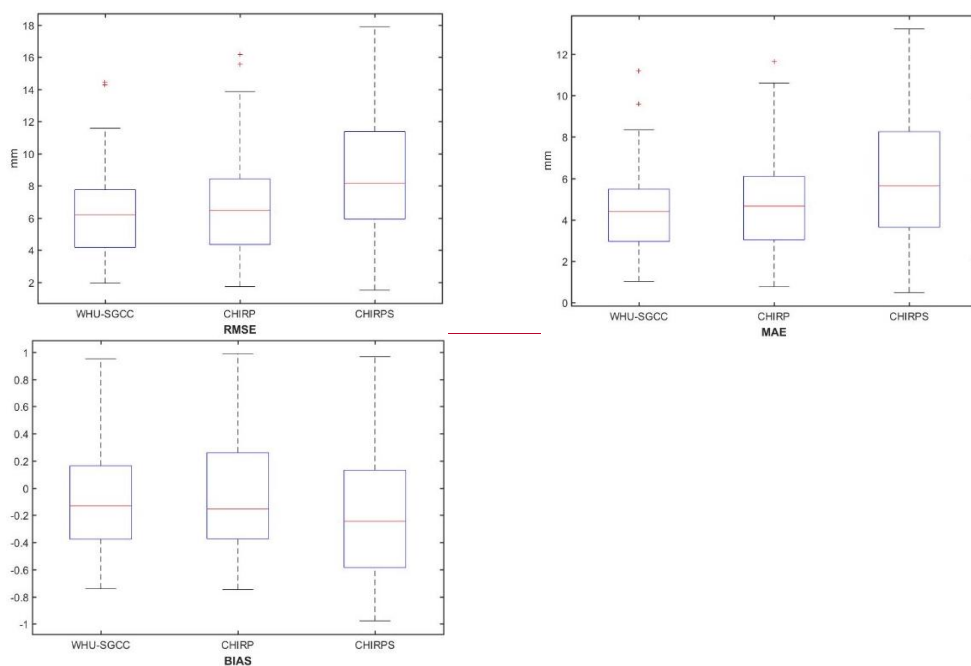

**Figure 9** The statistical analysis of the agreement between daily observations and WHU-SGCC, CHIRP and CHIRPS estimates on 30% validation: a) root mean square error b) mean absolute error, and c) relative bias.

The series of daily precipitation differences between WHU-SGCC, CHIRP, CHIRPS and observations is presented in Fig. 10. In this comparison, the WHU-SGCC has the best agreement with the observations, and provides a certain improvement compared to CHIRP, while CHIRPS shows the greatest inconsistencies with the observations. indicates that short heavy rainstorms (Katsanos et al., 2016b; Herold et al., 2017). In general, the precipitation estimated using the WHU-SGCC method are superior to other products.

Furthermore, it is noted that differences in precipitation estimates and observations are reduced gradually as the season progresses, especially in August when rainfall is decreased. But at days 36 and 56, short heavy rain events occurred in conjunction with the largest differences in observed WHU-SGCC values. This However, in general, the precipitation estimated using the WHU-SGCC method are superior to other products.

带格式的: 缩进: 首行缩进: 0 厘米

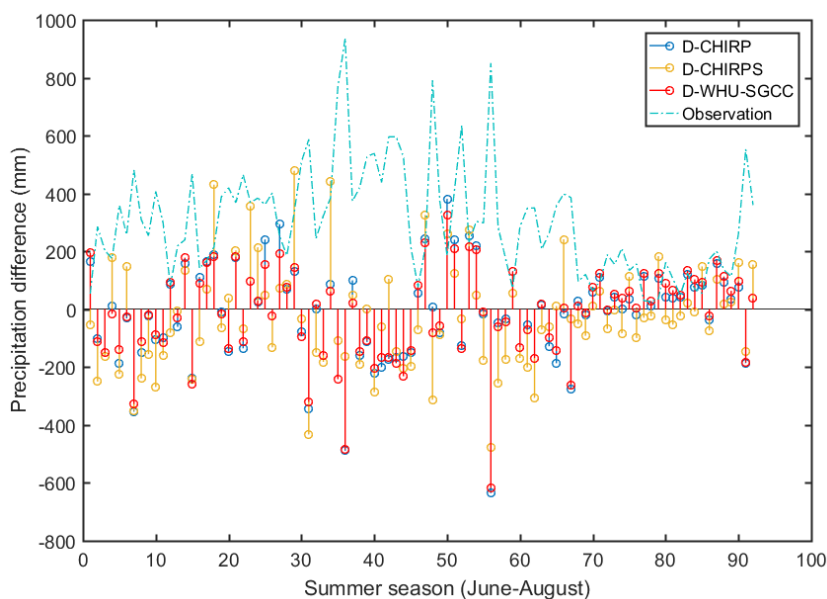

**Figure 10** The daily precipitation difference between WHU-SGCC, CHIRP, CHIRPS and observations; D-CHIRP is the difference between CHIRP and observations, D-CHIRPS is the difference between CHIRPS and observations, and D-WHU-SGCC is the difference between WHU-SGCC and observations.

#### 4.5.4 Model performance for rain events

To measure the WHU-SGCC performance for different rain events, the daily precipitation thresholds of 0.1, 10, 25, and 50 mm were considered, and the result is shown in Table 6 and Table 67 and Fig. 11. The days of each class of rain events at the validation gauge station during JJA from 1990 to 2014 were shown in Table 5. The major rain events inside the Jinsha River Basin were light rain (0.1-10 mm), accounting for 54.76% of the total days (the average percentage of rain event days in its total days at each gauge station), while the days with daily precipitation over the 50 mm was least, only accounting for 0.72%. And the percentage of the daily precipitation of  $\leq 0.1$ , 10-25, and 25-50 mm were 26.89%, 14.01% and 3.62% respectively. The result indicated that the average daily precipitation was less than 10 mm, though in the summer seasons during the multi-year. As well as, the spatial distribution of precipitation was also uneven, with an increase from north to south.

Table 6:

In terms of performance with respect to different daily rain events, the WHU-SGCC approach had the lowest error, as indicated by RMSE, MAE and BIAS for events with total rainfall between 1 and 20 mm, but WHU-SGCC performance for heavy rain (20-40 mm) events did not improve compared to CHIRP, though it was better than that of CHIRPS. Although the WHU-SGCC approach improved accuracy for light rain events, its behaviour for heavy rain ( $\geq 40$  mm) events was not as good as CHIRP and CHIRPS, as shown in Fig. 11. These results indicate that WHU-SGCC is applicable for the detection of rainfall events with less than 20 mm precipitation, while there is insufficient observational data for the validation of WHU-SGCC performance during heavy rain events, which represented less than 4% of all observational data and were not sufficient to fully test

605  
606

performance of the model.

**Table 5** The days of each class of rain events at the validation gauge station during JJA from 1990 to 2014 inside the Jinsha River

| <div>Rain event<br/>(mm)</div> <div>Validation gauge station</div> | <0.1 | [0.1,10) | [10,25) | [25,50) | ≥50 | Total days |
|--------------------------------------------------------------------|------|----------|---------|---------|-----|------------|
| 52908                                                              | 637  | 1186     | 134     | 9       | 0   | 1966       |
| 56004                                                              | 628  | 1243     | 128     | 3       | 0   | 2002       |
| 56021                                                              | 535  | 1305     | 166     | 9       | 0   | 2015       |
| 56029                                                              | 556  | 1328     | 190     | 5       | 0   | 2079       |
| 56034                                                              | 558  | 1351     | 185     | 17      | 0   | 2111       |
| 56038                                                              | 459  | 1329     | 222     | 16      | 0   | 2026       |
| 56144                                                              | 562  | 1153     | 321     | 25      | 0   | 2061       |
| 56146                                                              | 467  | 1278     | 267     | 19      | 0   | 2031       |
| 56152                                                              | 466  | 1255     | 307     | 35      | 1   | 2064       |
| 56167                                                              | 565  | 1234     | 278     | 20      | 0   | 2097       |
| 56247                                                              | 591  | 1089     | 246     | 34      | 0   | 1960       |
| 56251                                                              | 466  | 1247     | 320     | 30      | 0   | 2063       |
| 56257                                                              | 336  | 1212     | 429     | 59      | 0   | 2036       |
| 56357                                                              | 313  | 1247     | 373     | 63      | 1   | 1997       |
| 56374                                                              | 393  | 1191     | 351     | 47      | 0   | 1982       |
| 56459                                                              | 487  | 1080     | 377     | 102     | 13  | 2059       |
| 56462                                                              | 185  | 1315     | 430     | 86      | 2   | 2018       |
| 56475                                                              | 544  | 983      | 352     | 148     | 20  | 2047       |
| 56479                                                              | 667  | 931      | 298     | 156     | 28  | 2080       |
| 56485                                                              | 588  | 905      | 232     | 100     | 37  | 1862       |
| 56543                                                              | 332  | 1200     | 289     | 41      | 1   | 1863       |
| 56565                                                              | 526  | 1020     | 349     | 120     | 13  | 2028       |
| 56571                                                              | 674  | 819      | 301     | 159     | 49  | 2002       |
| 56586                                                              | 730  | 950      | 223     | 79      | 9   | 1991       |
| 56651                                                              | 402  | 1056     | 391     | 137     | 31  | 2017       |
| 56664                                                              | 727  | 797      | 306     | 166     | 56  | 2052       |
| 56666                                                              | 858  | 791      | 226     | 128     | 44  | 2047       |
| 56671                                                              | 616  | 886      | 289     | 148     | 70  | 2009       |
| 56684                                                              | 768  | 899      | 246     | 114     | 19  | 2046       |
| 56778                                                              | 682  | 930      | 274     | 119     | 43  | 2048       |

带格式的: 居中

带格式表格

607  
608

In terms of performance with respect to different daily rain events, the WHU-SGCC approach had the lowest error, as indicated by RMSE, MAE and BIAS for events with total rainfall ~~between 4 and 20~~ lower than 25 mm, but WHU-SGCC performance for total rainfall higher than 25mm heavy rain (20-40 mm) events did not improve compared to CHIRP and CHIRPS (Table 6), ~~though it was better than that of CHIRPS. This negative performance on the total rainfall higher than 25 mm was probably caused by the precipitation conditions inside the Jinsha River Basin (Table 5). The average daily precipitation was less than 10 mm inside the basin, during the multi-year summer seasons, which provided a large amount of rain gauge stations data with the values lower than 10 mm, that caused a significantly impact on the statistical relationships establishment for WHU-SGCC.~~ In hence, the approach of WHU-SGCC is applicable for the detection of rainfall events over the Jinsha River Basin, with the precipitation less than 10 mm, or even than 25mm. Due to the 4.34% of summer days with the daily precipitation over the 25 mm, the performance of WHU-SGCC on these rain events was poorer than the results of CHIRP and CHRPS.

619  
620  
621  
622  
623  
624  
625  
626  
627  
628  
629  
630

Although the WHU-SGCC approach improved accuracy for light rain events, its behaviour for heavy rain ( $\geq 40$  mm) events was not as good as CHIRP and CHIRPS, as shown in Fig. 9. These results indicate that WHU-SGCC is applicable for the detection of rainfall events with less than 20 mm precipitation, while there is insufficient observational data for the validation of WHU-SGCC performance during heavy rain events, which represented less than 4% of all observational data and were not sufficient to fully test performance of the model.

Table 6 Accuracy assessment on wet precipitation events for JJA 2016

| Rain Event | RMSE     |         |         | MAE      |         |         | BIAS     |        |        |
|------------|----------|---------|---------|----------|---------|---------|----------|--------|--------|
|            | WHU-SGCC | CHIRP   | CHIRPS  | WHU-SGCC | CHIRP   | CHIRPS  | WHU-SGCC | CHIRP  | CHIRPS |
| {0,1}      | 4.1609   | 4.5077  | 5.2762  | 2.3569   | 2.2940  | 2.2187  | 4.8423   | 4.9153 | 4.7541 |
| {1,2}      | 4.2658   | 4.7385  | 6.2943  | 2.4820   | 2.5563  | 3.3707  | 1.3491   | 1.8199 | 2.3996 |
| {2,5}      | 4.8378   | 5.2392  | 7.7315  | 3.2026   | 3.4011  | 5.2681  | 0.2808   | 1.0023 | 1.5525 |
| {5,10}     | 4.8765   | 5.5616  | 8.4619  | 4.0646   | 4.5505  | 6.8346  | -0.2292  | 0.6315 | 0.9485 |
| {10,20}    | 8.8240   | 9.5254  | 11.5381 | 7.5957   | 8.3153  | 10.0287 | -0.4627  | 0.6142 | 0.7408 |
| {20,40}    | 17.3305  | 17.0107 | 18.8758 | 15.5649  | 15.2646 | 16.4080 | -0.6035  | 0.6011 | 0.6461 |
| $\geq 40$  | 95.8157  | 95.5185 | 95.2107 | 64.6789  | 64.1252 | 64.6337 | -0.8850  | 0.8774 | 0.8844 |

Table 6 Accuracy assessment on liquid precipitation events during the JJA from 1990 to 2014

| Rain Event | RMSE     |         |         | MAE      |         |         | BIAS     |        |        |
|------------|----------|---------|---------|----------|---------|---------|----------|--------|--------|
|            | WHU-SGCC | CHIRP   | CHIRPS  | WHU-SGCC | CHIRP   | CHIRPS  | WHU-SGCC | CHIRP  | CHIRPS |
| <0.1       | 4.7253   | 5.0802  | 7.1643  | 2.5927   | 2.9562  | 2.9145  | /        | /      | /      |
| {0.1,10}   | 4.1661   | 6.8684  | 9.6022  | 3.9885   | 4.5534  | 6.2462  | 0.8021   | 1.4435 | 1.9842 |
| {10,25}    | 10.4281  | 11.0848 | 13.4427 | 9.2722   | 9.6866  | 11.5909 | -0.5762  | 0.6342 | 0.7559 |
| {25,50}    | 25.7494  | 24.5600 | 25.4975 | 24.8386  | 23.0967 | 23.4927 | -0.7784  | 0.7250 | 0.7388 |
| $\geq 50$  | 56.6072  | 54.5037 | 52.7875 | 54.4168  | 52.1557 | 49.4318 | -0.8861  | 0.8297 | 0.7852 |

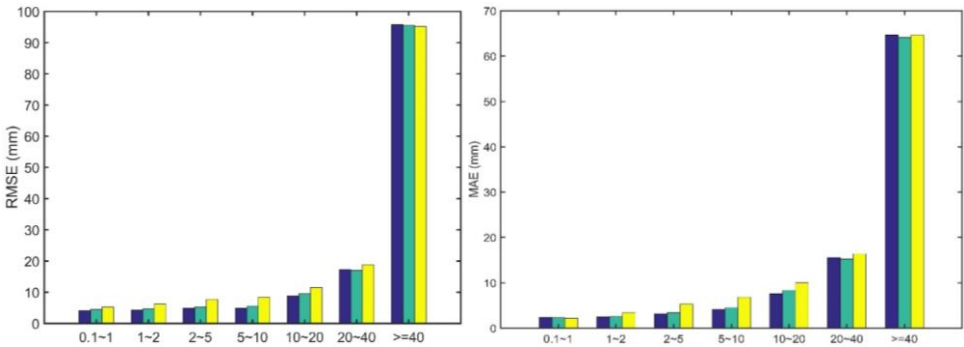

带格式的: 居中

带格式的: 居中

带格式表格

批注 [S2]: This figure was same to the table 7, so we deleted it.

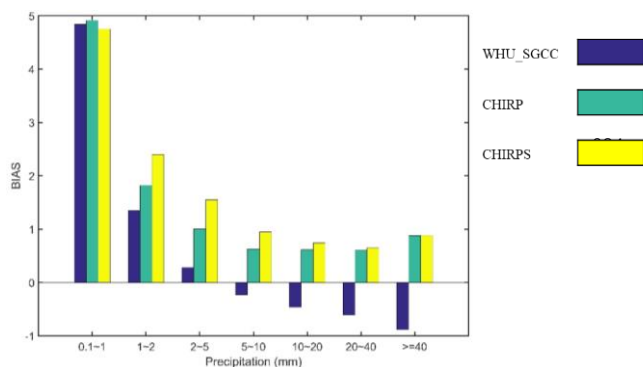

**Figure 11** Accuracy assessment based on daily observations for the estimations of WHU-SGCC, CHIRP and CHIRPS for wet precipitation events in JJA 2016: a) root mean square error b) mean absolute error, and c) relative bias.

## 5 Data availability

All the resulting dataset derived from the WHU-SGCC approach is available on PANGAEA, with the following DOI: <https://doi.pangaea.de/10.1594/PANGAEA.896615> (Shen et al., 2018). The high-resolution (0.05°) daily precipitation estimation data over Jinsha River Basin in summer 2016 can be downloaded in TIFF format.

## 6 Conclusions

This study provided a novel approach in the WHU-SGCC method for merging daily satellite-based precipitation estimates with observations. A case study of Jinsha River Basin was conducted to verify the effectiveness of the WHU-SGCC approach during the ~~in~~ JJA from 1990 to 20142016, and the adjusted precipitation estimates were compared to CHIRP and CHIRPS. WHU-SGCC aims to reduce systematic and random errors in CHIRP over ~~the a~~ region ~~that~~ has complicated mountainous terrain and sparse rain gauges. To the best of the authors' knowledge, this study is the first to use daily CHIRP and CHIRPS data in this area.

According to our findings, the following conclusions can be drawn: (1) The WHU-SGCC method is effective for the adjustment of precipitation biases from point to surface. The precipitation estimated by the WHU-SGCC method can achieve greater accuracy, which was evaluated with ~~SECC~~PCC, RMSE, MAE, BIAS, NSE, POD, FAR and CSI. Particularly, the ~~SECC~~ NSE statistic was improved by 47.3893.33% and 39.6298.32% compared to CHIRP and CHIRPS, respectively, and all measured errors were reduced ~~except the BIAS with no significant improvement, but approximately to 0~~. The results show that compared to CHIRPS, the WHU-SGCC approach can achieve substantial improvements in precipitation estimate accuracy. (2) Moreover, the spatial distribution of precipitation estimate accuracy derived from the WHU-SGCC method is related to the complexity of the topography. These random errors over the lower evaluations and the large size of ~~the light~~ precipitation events with short duration rainstorms in the region resulted in a limited improvement in accuracy, with ~~SECC~~PCC values less than 0.3, ~~especially during short rainstorms~~. However, higher ~~SECC~~PCC and lower errors were observed over the north central area of the river basin, which is a drier region with complex terrain and sparse rain gauges. All the spatial distribution statistics indicate that the WHU-SGCC method is superior for adjustment of satellite biases by blending with the observations over the ~~complex terrain~~ complicated mountainous region. (3) The WHU-SGCC validations for daily rain events confirmed that the model was effective in the detection of precipitation events less than 20-25 mm ~~due to the less average annual precipitation inside the Jinsha River Basin~~. According to the comparison, the WHU-SGCC approach achieves error reductions for the RMSE,

669 MAE and BIAS statistics for rain events within the range of 1-20-25 mm. Specifically, compared with CHIRP, the RMSE  
670 value was reduced by approximately by 5.92%-39.44%9%, the MAE value by 2.914.28% ~ 40.6812.41%, and the absolute  
671 BIAS value by 1.499.15% ~ 175.3344.43%; compared with CHIRPS, the RMSE and MAE values were reduced by 2011.04%  
672 ~ 4056.61%, and the absolute BIAS value by 43.7823.77% ~ 462.4659.58%.

673 Therefore, the WHU-SGCC approach can help adjust the biases of daily satellite-based precipitation estimates over the  
674 Jinsha River Basin, the complicated mountainous terrains with sparse rain gauges, particularly for precipitation events with  
675 less than 20-25 mm in summer. This approach is a promising tool to monitor monsoon precipitation over the Jinsha River  
676 Basin, considering the spatial correlation and historical precipitation characteristics between raster pixels located in regions  
677 with similar topographic features. Future development of the WHU-SGCC approach will focus on the following three aspects:  
678 1) improvement of the adjusted precipitation quality by blending in different rain reducing random error events and applying  
679 in all seasons; 2) introduction of more topographic factors and long time series climatic factors to achieve a more accurate  
680 spatial distribution of precipitation; and 3) investigation of the performance over other areas and on the particular hydrological  
681 case to validate the WHU-SGCC.

## 682 6 Data availability

683 All the resulting dataset derived from the WHU-SGCC approach is available on PANGAEA, with the following DOI:  
684 <https://doi.pangaea.de/10.1594/PANGAEA.896615> (Shen et al., 2018). The high-resolution (0.05°) daily precipitation  
685 estimation data over the Jinsha River Basin in the summer from 1990 to 2014 can be downloaded in TIFF format.

## 686 7 Acknowledgments

687 This work was supported by the National Natural Science Foundation of China program (no. 41771422), the Nature Science  
688 Foundation of Hubei Province (no. 2017CFB616), the fundamental research funds for the central universities (no.  
689 2042017kf0211), and the LIESMARS Special Research Funding.

690 The authors would like to thank data support: the Climate Hazards Group at the University of California, Santa Barbara, for  
691 providing CHIRP and CHIRPS datasets (<http://chg.ucsb.edu/data/>), and the National Climate Center (NCC) of the China  
692 Meteorological Administration (CMA) for providing the daily rain gauged observations and gridded precipitation observations  
693 (<http://data.cma.cn/>). The authors also thank the PANGAEA Data Publisher for Earth & Environmental Science platform for  
694 providing the storage to disseminate the data generated in this experiment.

695 The authors are grateful for the editor and anonymous reviewers for their useful suggestions that clearly improved this paper.

## 696 References

- 697 Adler, R. F., Huffman, G. J., Chang, A., Ferraro, R., Xie, P. P., Janowiak, J., Rudolf, B., Schneider, U., Curtis, S., Bolvin, D.,  
698 Gruber, A., Susskind, J., Arkin, P., and Nelkin, E.: The version-2 global precipitation climatology project (GPCP) monthly  
699 precipitation analysis (1979-present), J. Hydrometeorol., 4, 1147-1167, doi:10.1175/1525-  
700 7541(2003)004<1147:tvGPCP>2.0.co;2, 2003.
- 701 AghaKouchak, A., Behrangi, A., Sorooshian, S., Hsu, K., and Amitai, E.: Evaluation of satellite-retrieved extreme precipitation  
702 rates across the central United States, J. Geophys. Res.-Atmos., 116, 11, doi:10.1029/2010jd014741, 2011.
- 703 Agutu, N. O., Awange, J. L., Zerihun, A., Ndehedehe, C. E., Kuhn, M., and Fukuda, Y.: Assessing multi-satellite remote sensing,  
704 reanalysis, and land surface models' products in characterizing agricultural drought in East Africa, Remote Sens. Environ.,  
705 194, 287-302, doi:10.1016/j.rse.2017.03.041, 2017.

域代码已更改



Ali, H., and Mishra, V.: Contrasting response of rainfall extremes to increase in surface air and dewpoint temperatures at urban locations in India, *Sci Rep*, 7, 1228, doi:10.1038/s41598-017-01306-1, 2017.

Anders, A. M., Roe, G. H., Hallet, B., Montgomery, D. R., Finnegan, N. J., and Putkonen, J.: Spatial patterns of precipitation and topography in the Himalaya, *Tectonics, Climate, and Landscape Evolution*, 398, 39-53, doi:10.1130/2006.2398(03), 2006.

Ashouri, H., Hsu, K.-L., Sorooshian, S., Braithwaite, D. K., Knapp, K. R., Cecil, L. D., Nelson, B. R., and Prat, O. P.: PERSIANN-CDR: Daily Precipitation Climate Data Record from Multisatellite Observations for Hydrological and Climate Studies, *Bulletin of the American Meteorological Society*, 96, 69-83, doi:10.1175/bams-d-13-00068.1, 2015.

Bai, L., Shi, C. X., Li, L. H., Yang, Y. F., and Wu, J.: Accuracy of CHIRPS Satellite-Rainfall Products over Mainland China, *Remote Sens.*, 10, 28, doi:10.3390/rs10030362, 2018.

Behrangi, A., Andreadis, K., Fisher, J. B., Turk, F. J., Granger, S., Painter, T., and Das, N.: Satellite-Based Precipitation Estimation and Its Application for Streamflow Prediction over Mountainous Western US Basins, *J. Appl. Meteorol. Climatol.*, 53, 2823-2842, doi:10.1175/jamc-d-14-0056.1, 2014.

Behrangi, A., Hsu, K. L., Imam, B., Sorooshian, S., Huffman, G. J., and Kuligowski, R. J.: PERSIANN-MSA: A Precipitation Estimation Method from Satellite-Based Multispectral Analysis, *J. Hydrometeorol.*, 10, 1414-1429, doi:10.1175/2009jhm1139.1, 2009.

Berndt, C., Rabiei, E., and Haberlandt, U.: Geostatistical merging of rain gauge and radar data for high temporal resolutions and various station density scenarios, *Journal of Hydrology*, 508, 88-101, doi:10.1016/j.jhydrol.2013.10.028, 2014.

Cattani, E., Merino, A., Guijarro, J. A., and Levizzani, V.: East Africa Rainfall Trends and Variability 1983-2015 Using Three Long-Term Satellite Products, *Remote Sens.*, 10, 26, doi:10.3390/rs10060931, 2018.

Chen, F. W., and Liu, C. W.: Estimation of the spatial rainfall distribution using inverse distance weighting (IDW) in the middle of Taiwan, *Paddy Water Environ.*, 10, 209-222, doi:10.1007/s10333-012-0319-1, 2012.

Chen, J., Brissette, F. P., Chaumont, D., and Braun, M.: Finding appropriate bias correction methods in downscaling precipitation for hydrologic impact studies over North America, *Water Resources Research*, 49, 4187-4205, doi:10.1002/wrcr.20331, 2013.

Derin, Y., Anagnostou, E., Berne, A., Borga, M., Boudevillain, B., Buytaert, W., Chang, C.-H., Delrieu, G., Hong, Y., Hsu, Y. C., Lavado-Casimiro, W., Manz, B., Moges, S., Nikolopoulos, E. I., Sahlu, D., Salerno, F., Rodriguez-Sanchez, J.-P., Vergara, H. J., and Yilmaz, K. K.: Multiregional Satellite Precipitation Products Evaluation over Complex Terrain, *J. Hydrometeorol.*, 17, 1817-1836, doi:10.1175/jhm-d-15-0197.1, 2016.

Duan, Z., Liu, J. Z., Tuo, Y., Chiogna, G., and Disse, M.: Evaluation of eight high spatial resolution gridded precipitation products in Adige Basin (Italy) at multiple temporal and spatial scales, *Sci. Total Environ.*, 573, 1536-1553, doi:10.1016/j.scitotenv.2016.08.213, 2016.

Dunn, J. C.: A fuzzy relative of the ISODATA Process and Its Use in Detecting Compact Well-Separated Clusters, *Journal of Cybernetics*, 3, 32-57, 1973.

Durre, I., Menne, M. J., Gleason, B. E., Houston, T. G., and Vose, R. S.: Comprehensive Automated Quality Assurance of Daily Surface Observations, *J. Appl. Meteorol. Climatol.*, 49, 1615-1633, doi:10.1175/2010jamc2375.1, 2010.

Funk, C., Peterson, P., Landsfeld, M., Pedreros, D., Verdin, J., Shukla, S., Husak, G., Rowland, J., Harrison, L., Hoell, A., and Michaelsen, J.: The climate hazards infrared precipitation with stations-a new environmental record for monitoring extremes, *Sci. Data*, 2, 21, doi:10.1038/sdata.2015.66, 2015 a.

Funk, C., Verdin, A., Michaelsen, J., Peterson, P., Pedreros, D., and Husak, G.: A global satellite-assisted precipitation climatology, *Earth Syst. Sci. Data*, 7, 275-287, doi:10.5194/essd-7-275-2015, 2015 b.

Funk, C., Peterson, P., Landsfeld, M., Pedreros, D., Verdin, J., Rowland, J., Bo, E., Husak, G. J., Michaelsen, J. C., and Verdin, A. P.: A Quasi-Global Precipitation Time Series for Drought Monitoring Data Series 832, *Usgs Professional Paper*, Data

带格式的: 正文, 缩进: 左侧: 0 厘米, 悬挂缩进: 2 字符, 首行缩进: -2 字符, 定义网格后不调整右缩进, 行距: 1.5 倍行距, 不调整西文与中文之间的空格, 不调整中文和数字之间的空格

Series, 2014.

Genuer, R., Poggi, J. M., Tuleau-Malot, C., and Villa-Vialaneix, N.: Random Forests for Big Data, *Big Data Res.*, 9, 28-46, doi:10.1016/j.bdr.2017.07.003, 2017.

Gudmundsson, L., Bremnes, J. B., Haugen, J. E., and Engen-Skaugen, T.: Technical Note: Downscaling RCM precipitation to the station scale using statistical transformations - a comparison of methods, *Hydrology and Earth System Sciences*, 16, 3383-3390, doi:10.5194/hess-16-3383-2012, 2012.

Guo, P.-T., Li, M.-F., Luo, W., Tang, Q.-F., Liu, Z.-W., and Lin, Z.-M.: Digital mapping of soil organic matter for rubber plantation at regional scale: An application of random forest plus residuals kriging approach, *Geoderma*, 237-238, 49-59, 10.1016/j.geoderma.2014.08.009, 2015.

Herold, N., Behrangi, A., and Alexander, L. V.: Large uncertainties in observed daily precipitation extremes over land, *J. Geophys. Res.-Atmos.*, 122, 668-681, doi:10.1002/2016jd025842, 2017.

Huffman, G. J., Adler, R. F., Arkin, P., Chang, A., Ferraro, R., Gruber, A., Janowiak, J., McNab, A., Rudolf, B., and Schneider, U.: The Global Precipitation Climatology Project (GPCP) Combined Precipitation Dataset, *Bulletin of the American Meteorological Society*, 78, 5-20, doi:10.1175/1520-0477(1997)078<0005:tgpcpg>2.0.co;2, 1997.

Johnson, R. W.: An Introduction to the Bootstrap, Chapman & Hall/CRC Press, 49-54 pp., 1998.

Katsanos, D., Retalis, A., and Michaelides, S.: Validation of a high-resolution precipitation database (CHIRPS) over Cyprus for a 30-year period, *Atmospheric Research*, 169, 459-464, doi:10.1016/j.atmosres.2015.05.015, 2016a.

Katsanos, D., Retalis, A., Tymvios, F., and Michaelides, S.: Analysis of precipitation extremes based on satellite (CHIRPS) and in situ dataset over Cyprus, *Natural Hazards*, 83, 53-63, doi:10.1007/s11069-016-2335-8, 2016b.

Kummerow, C., Barnes, W., Kozu, T., Shiue, J., and Simpson, J.: The Tropical Rainfall Measuring Mission (TRMM) sensor package, *J. Atmos. Ocean. Technol.*, 15, 809-817, doi:10.1175/1520-0426(1998)015<0809:ttrmmt>2.0.co;2, 1998.

Long, D., and Singh, V. P.: Assessing the impact of end-member selection on the accuracy of satellite-based spatial variability models for actual evapotranspiration estimation, *Water Resources Research*, 49, 2601-2618, doi:10.1002/wrcr.20208, 2013.

Lu, G. Y., and Wong, D. W.: An adaptive inverse-distance weighting spatial interpolation technique, *Comput. Geosci.*, 34, 1044-1055, 10.1016/j.cageo.2007.07.010, 2008.

Maggioni, V., and Massari, C.: on the performance of satellite precipitation products in riverine flood modeling: A review, *Journal of Hydrology*, 558, 214-224, 10.1016/j.jhydrol.2018.01.039, 2018.

Mahmoud, M. T., Al-Zahrani, M. A., and Sharif, H. O.: Assessment of global precipitation measurement satellite products over Saudi Arabia, *Journal of Hydrology*, 559, 1-12, 10.1016/j.jhydrol.2018.02.015, 2018.

Mahmoud, M. T., Hamouda, M. A., and Mohamed, M. M.: Spatiotemporal evaluation of the GPM satellite precipitation products over the United Arab Emirates, *Atmospheric Research*, 219, 200-212, 10.1016/j.atmosres.2018.12.029, 2019.

Martens, B., Cabus, P., De Jongh, I., and Verhoest, N. E. C.: Merging weather radar observations with ground-based measurements of rainfall using an adaptive multiquadric surface fitting algorithm, *Journal of Hydrology*, 500, 84-96, doi:10.1016/j.jhydrol.2013.07.011, 2013.

Nash, J. E., Sutcliffe, J. V.: River flow forecasting through conceptual models, Part I - A discussion of principles, *Journal of Hydrology*, 10, 282-290, doi.org/10.1016/0022-1694(70)90255-6, 1970.

Nogueira, S. M. C., Moreira, M. A., and Volpato, M. M. L.: Evaluating Precipitation Estimates from Eta, TRMM and CHIRPS Data in the South-Southeast Region of Minas Gerais State-Brazil, *Remote Sens.*, 10, 16, doi:10.3390/rs10020313, 2018.

Ning, S., Wang, J., Jin, J., and Ishidaira, H.: Assessment of the Latest GPM-Era High-Resolution Satellite Precipitation Products by Comparison with Observation Gauge Data over the Chinese Mainland, *Water*, 8, 481-497, doi:10.3390/w8110481, 2016.

Paredes-Trejo, F. J., Barbosa, H. A., and Kumar, T. V. L.: Validating CHIRPS-based satellite precipitation estimates in

带格式的: 缩进: 左侧: 0 厘米, 悬挂缩进: 2 字符, 首行缩进: -2 字符

带格式的: 缩进: 左侧: 0 厘米, 悬挂缩进: 2 字符, 首行缩进: -2 字符

域代码已更改

- Northeast Brazil, *J. Arid. Environ.*, 139, 26-40, doi:10.1016/j.jaridenv.2016.12.009, 2017.
- Pessoa, F. C. L., Blanco, C. J. C., and Gomes, E. P.: Delineation of homogeneous regions for streamflow via fuzzy c-means in the Amazon, *Water Pract. Technol.*, 13, 210-218, doi:10.2166/wpt.2018.035, 2018.
- Rivera, J. A., Marianetti, G., and Hinrichs, S.: Validation of CHIRPS precipitation dataset along the Central Andes of Argentina, *Atmospheric Research*, 213, 437-449, doi:10.1016/j.atmosres.2018.06.023, 2018.
- Roy, T., Gupta, H. V., Serrat-Capdevila, A., and Valdes, J. B.: Using satellite-based evapotranspiration estimates to improve the structure of a simple conceptual rainfall&ndash;runoff model, *Hydrology and Earth System Sciences*, 21, 879-896, doi:10.5194/hess-21-879-2017, 2017.
- ~~Schmit, T. J., Gunshor, M. M., Menzel, W. P., Gurka, J. J., Li, J., and Bachmeier, A. S.: Introducing the next-generation Advanced Baseline Imager on goes-R, *Bulletin of the American Meteorological Society*, 86, 1079-+, doi:10.1175/bams-86-8-1079, 2005.~~
- Shen, G. Y., Chen, N. C., Wang, W., Chen, Z. Q.: High-resolution daily precipitation estimation data derived from Wuhan University Satellite and Gauge precipitation Collaborated Correction method (WHU-SGCC) in TIFF format. PANGAEA, <https://doi.pangaea.de/10.1594/PANGAEA.896615> (~~DOI registration in progress~~), 2018.
- Simpson, J., Adler, R. F., and North, G. R.: A PROPOSED TROPICAL RAINFALL MEASURING MISSION (TRMM) SATELLITE, *Bulletin of the American Meteorological Society*, 69, 278-295, doi:10.1175/1520-0477(1988)069<0278:aptrmm>2.0.co;2, 1988.
- Sokol, Z.: The use of radar and gauge measurements to estimate areal precipitation for several Czech River basins, *Stud. Geophys. Geod.*, 47, 587-604, doi:10.1023/a:1024715702575, 2003.
- Su, F. G., Gao, H. L., Huffman, G. J., and Lettenmaier, D. P.: Potential Utility of the Real-Time TMPA-RT Precipitation Estimates in Streamflow Prediction, *J. Hydrometeorol.*, 12, 444-455, doi:10.1175/2010jhm1353.1, 2011.
- ~~Themessl, M. J., Gobiet, A., and Leuprecht, A.: Empirical statistical downscaling and error correction of daily precipitation from regional climate models, *Int. J. Climatol.*, 31, 1530-1544, doi:10.1002/joc.2168, 2011.~~
- Thiemig, V., Rojas, R., Zambrano-Bigiarini, M., and De Roo, A.: Hydrological evaluation of satellite-based rainfall estimates over the Volta and Baro-Akobo Basin, *Journal of Hydrology*, 499, 324-338, doi:10.1016/j.jhydrol.2013.07.012, 2013.
- Trejo, F. J. P., Barbosa, H. A., Penaloza-Murillo, M. A., Moreno, M. A., and Farias, A.: Intercomparison of improved satellite rainfall estimation with CHIRPS gridded product and rain gauge data over Venezuela, *Atmosfera*, 29, 323-342, doi:10.20937/atm.2016.29.04.04, 2016.
- Verdin, A., Rajagopalan, B., Kleiber, W., and Funk, C.: A Bayesian kriging approach for blending satellite and ground precipitation observations, *Water Resources Research*, 51, 908-921, 2015.
- Vila, D. A., de Goncalves, L. G. G., Toll, D. L., and Rozante, J. R.: Statistical Evaluation of Combined Daily Gauge Observations and Rainfall Satellite Estimates over Continental South America, *J. Hydrometeorol.*, 10, 533-543, doi:10.1175/2008jhm1048.1, 2009.
- Wang, P. H.: PATTERN-RECOGNITION WITH FUZZY OBJECTIVE FUNCTION ALGORITHMS - BEZDEK, JC, *SIAM Rev.*, 25, 442-442, 1983.
- Xie, P. P., and Arkin, P. A.: Analyses of global monthly precipitation using gauge observations, satellite estimates, and numerical model predictions, *Journal of Climate*, 9, 840-858, doi:10.1175/1520-0442(1996)009<0840:aogmpu>2.0.co;2, 1996.
- Yang, T. T., Asanjan, A. A., Welles, E., Gao, X. G., Sorooshian, S., and Liu, X. M.: Developing reservoir monthly inflow forecasts using artificial intelligence and climate phenomenon information, *Water Resources Research*, 53, 2786-2812, doi:10.1002/2017wr020482, 2017.
- Yang, Z., Hsu, K., Sorooshian, S., Xu, X., Braithwaite, D., and Verbist, K. M. J.: Bias adjustment of satellite-based precipitation estimation using gauge observations: A case study in Chile, *Journal of Geophysical Research: Atmospheres*, 121, 3790-

835 3806, doi:10.1002/2015jd024540, 2016.

836 [Yuan, Z., Xu, J. J., and Wang, Y. Q.: Projection of Future Extreme Precipitation and Flood Changes of the Jinsha River Basin](#)

837 [in China Based on CMIP5 Climate Models, Int. J. Environ. Res. Public Health, 15, 17, 10.3390/ijerph15112491, 2018.](#)

838 Zambrano-Bigiarini, M., Nauditt, A., Birkel, C., Verbist, K., and Ribbe, L.: Temporal and spatial evaluation of satellite-based

839 rainfall estimates across the complex topographical and climatic gradients of Chile, Hydrology and Earth System Sciences,

840 21, 1295-1320, doi:10.5194/hess-21-1295-2017, 2017.

841 [Zhang, X., and Chen, N. C.: Reconstruction of GF-1 Soil Moisture Observation Based on Satellite and In Situ Sensor](#)

842 [Collaboration Under Full Cloud Contamination, Ieee Transactions on Geoscience and Remote Sensing, 54, 5185-5202,](#)

843 [10.1109/tgrs.2016.2558109, 2016.](#)

844 [Zhang, Y. R., Sun, A., Sun, H. W., Gui, D. W., Xue, J., Liao, W. H., Yan, D., Zhao, N., and Zeng, X. F.: Error adjustment of](#)

845 [TMPA satellite precipitation estimates and assessment of their hydrological utility in the middle and upper Yangtze River](#)

846 [Basin, China, Atmospheric Research, 216, 52-64, 10.1016/j.atmosres.2018.09.021, 2019.](#)

带格式的: 缩进: 左侧: 0 厘米, 悬挂缩进: 2 字符, 首行缩进: -2 字符

域代码已更改

带格式的: 缩进: 左侧: 0 厘米, 悬挂缩进: 2 字符, 首行缩进: -2 字符

域代码已更改

带格式的: 缩进: 左侧: 0 厘米, 悬挂缩进: 2 字符, 首行缩进: -2 字符

带格式的: 缩进: 左侧: 0 厘米, 悬挂缩进: 2 字符, 首行缩进: -2 字符
