# Supplementary material for: WHU-SGCC: A novel approach for blending daily satellite (CHIRP) and precipitation observations over Jinsha River Basin
Source: Copernicus journal article supplement (doi:10.5194/essd-2018-150), 2019-01-02
Supplement: Supplementary file [file essd-2018-150-AC2-supplement.zip]

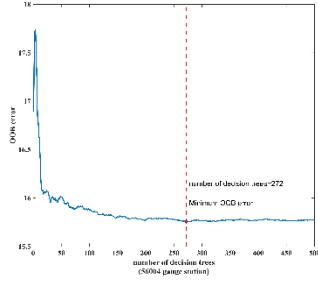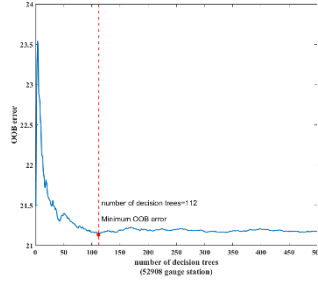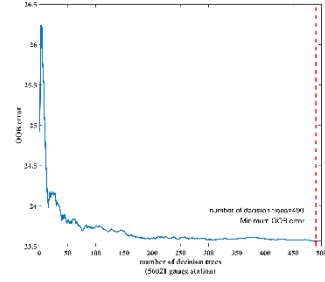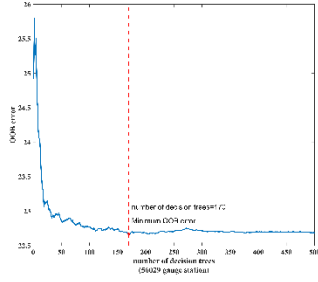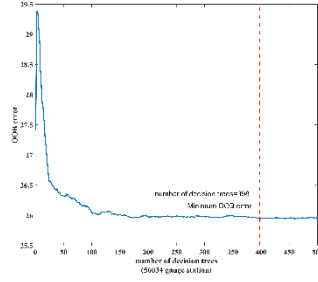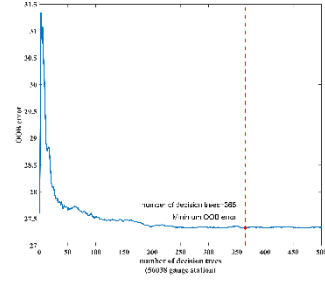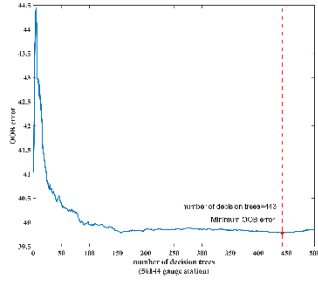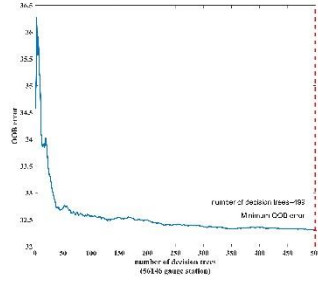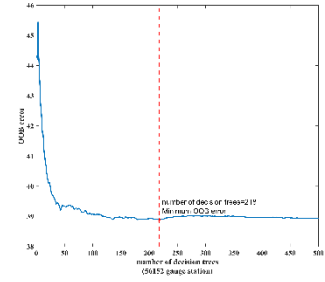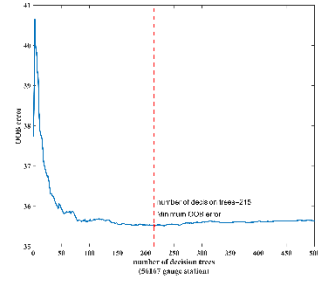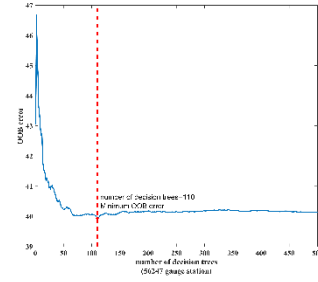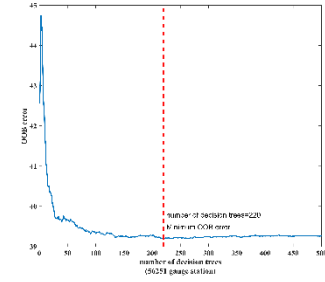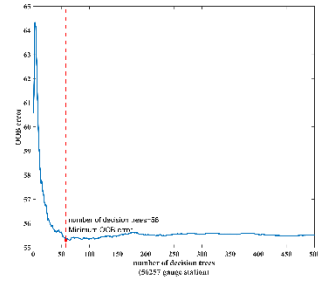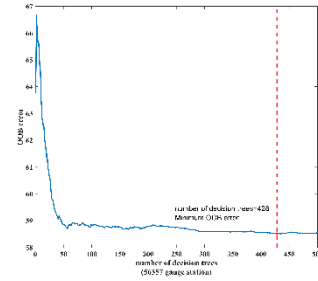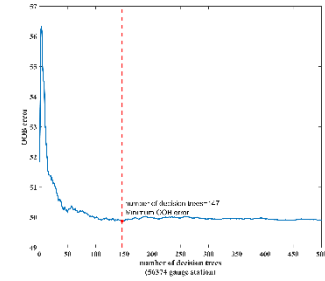

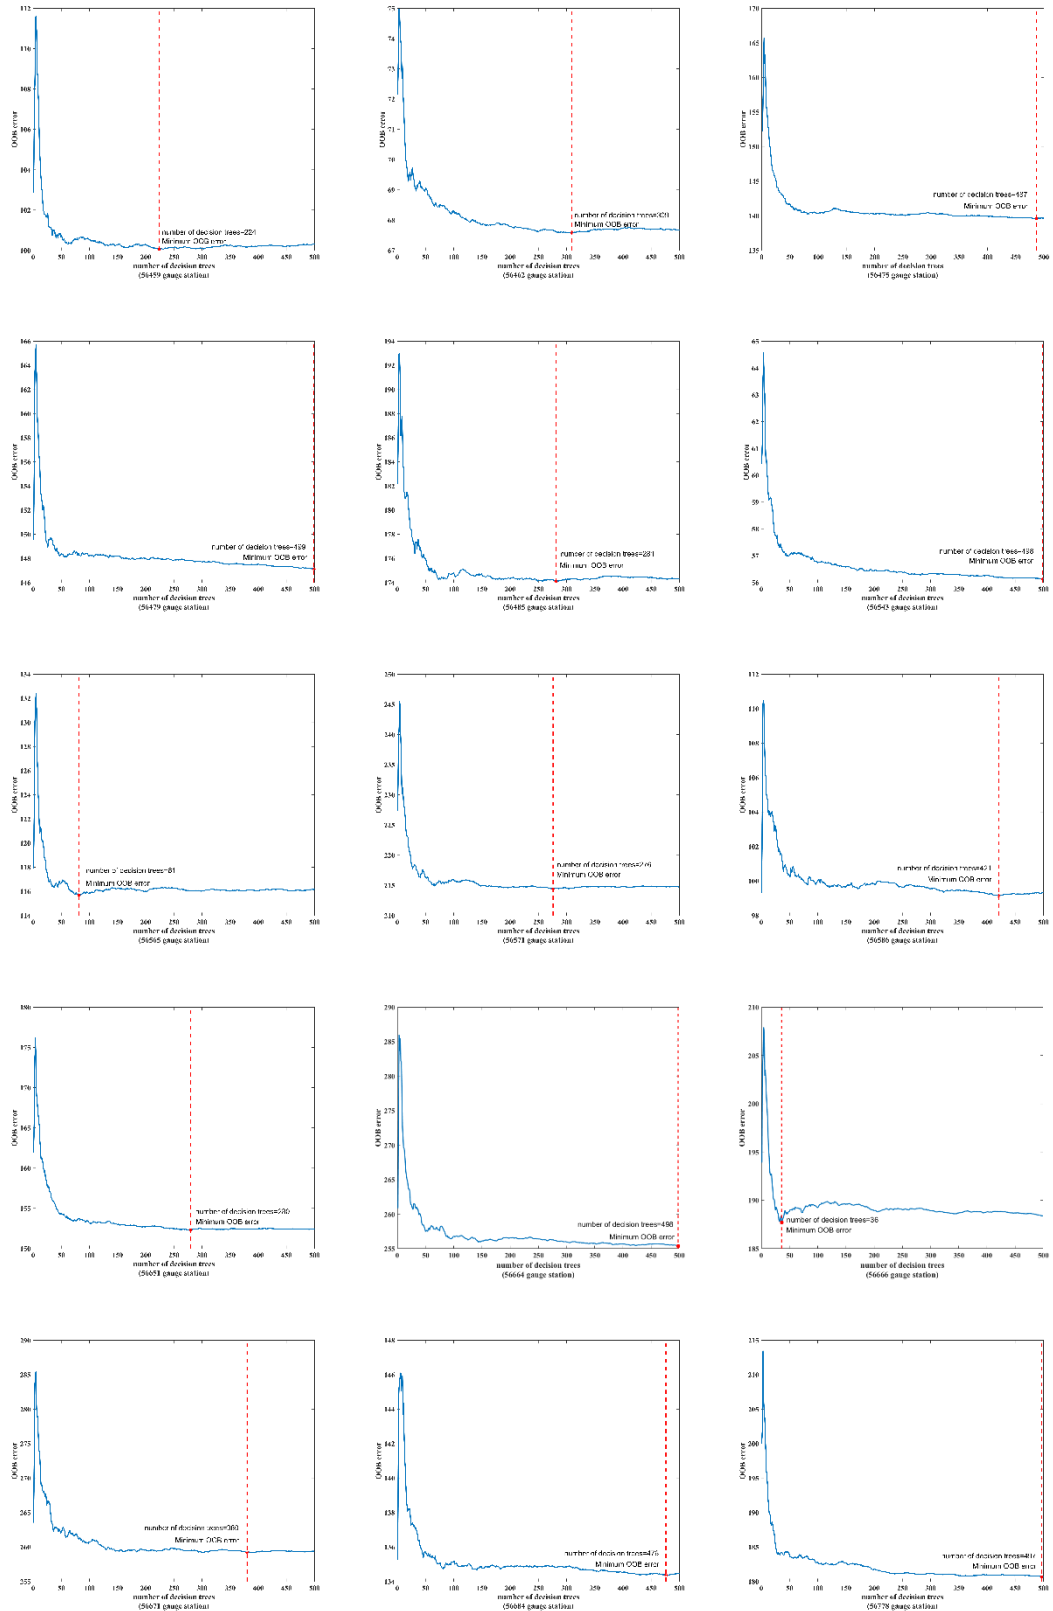

Figure S1. The change of out-of-bag (OOB) error with the number of decision trees increase by means of random forest regression at each gauge station.
